# Supplementary material for: Trans-omics Impact of Thymoproteasome in Cortical Thymic Epithelial Cells
Source: PubMed Central journal article supplement — Cell Rep. Author manuscript; Available in PMC 2019 Dec 6. (PMC6897492; doi:10.1016/j.celrep.2019.10.079), 2019-11-26
Supplement: NIHMS1544761-supplement-8.pdf [file NIHMS1544761-supplement-8.pdf]

## Trans-omics Impact of Thymoproteasome in Cortical Thymic Epithelial Cells

### Graphical Abstract

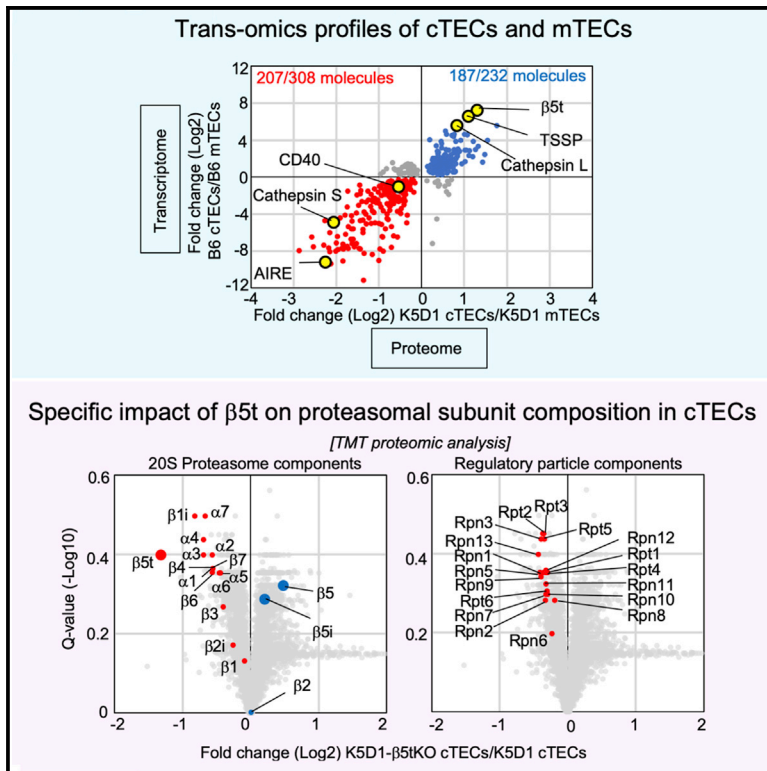

### Authors

Izumi Ohigashi, Yu Tanaka,  
Kenta Kondo, ..., Toyomasa Katagiri,  
Hidetaka Kosako, Yousuke Takahama

### Correspondence

yousuke.takahama@nih.gov

### In Brief

Ohigashi et al. show that the use of cyclin D1-transgenic mice allows quantitative proteomic analysis of cortical and medullary thymic epithelial cells (TECs). Results provide a trans-omics platform for further exploration of TEC biology and reveal the specific impact of the thymoproteasome on proteasome subunit composition in cortical TECs.

### Highlights

- Enlarged thymus in K5D1 mice produces immunocompetent and self-tolerant T cells
- Enlarged thymus in K5D1 mice enables proteomic analysis of cTECs and mTECs
- Trans-omics profiles identify signature molecules that characterize cTECs and mTECs
- beta5t deficiency specifically affects proteasomal subunit composition in cTECs

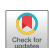

# Trans-omics Impact of Thymoproteasome in Cortical Thymic Epithelial Cells

Izumi Ohigashi,<sup>1,9</sup> Yu Tanaka,<sup>2,9</sup> Kenta Kondo,<sup>2</sup> Sayumi Fujimori,<sup>1</sup> Hiroyuki Kondo,<sup>1</sup> Amy C. Palin,<sup>2</sup> Victoria Hoffmann,<sup>3</sup> Mina Kozai,<sup>1</sup> Yosuke Matsushita,<sup>4</sup> Shinsuke Uda,<sup>5</sup> Ryo Motosugi,<sup>6</sup> Jun Hamazaki,<sup>6</sup> Hiroyuki Kubota,<sup>5</sup> Shigeo Murata,<sup>6</sup> Keiji Tanaka,<sup>7</sup> Toyomasa Katagiri,<sup>4</sup> Hidetaka Kosako,<sup>8</sup> and Yousuke Takahama<sup>2,10,\*</sup>

<sup>1</sup>Division of Experimental Immunology, Institute of Advanced Medical Sciences, University of Tokushima, Tokushima 770-8503, Japan

<sup>2</sup>Experimental Immunology Branch, National Cancer Institute, NIH, Bethesda, MD 20892, USA

<sup>3</sup>Division of Veterinary Resources, Office of Research Services, NIH, Bethesda, MD 20892, USA

<sup>4</sup>Division of Genome Medicine, Institute of Advanced Medical Sciences, University of Tokushima, Tokushima 770-8503, Japan

<sup>5</sup>Division of Integrated Omics, Medical Institute of Bioregulation, Kyushu University, Fukuoka 812-8582, Japan

<sup>6</sup>Laboratory of Protein Metabolism, Graduate School of Pharmaceutical Sciences, The University of Tokyo, Tokyo 113-0033, Japan

<sup>7</sup>Tokyo Metropolitan Institute for Medical Science, Tokyo 156-8506, Japan

<sup>8</sup>Division of Cell Signaling, Fujii Memorial Institute of Medical Sciences, Institute of Advanced Medical Sciences, University of Tokushima, Tokushima 770-8503, Japan

<sup>9</sup>These authors contributed equally

<sup>10</sup>Lead Contact

\*Correspondence: [yousuke.takahama@nih.gov](mailto:yousuke.takahama@nih.gov)

<https://doi.org/10.1016/j.celrep.2019.10.079>

## SUMMARY

The thymic function to produce self-protective and self-tolerant T cells is chiefly mediated by cortical thymic epithelial cells (cTECs) and medullary TECs (mTECs). Recent studies including single-cell transcriptomic analyses have highlighted a rich diversity in functional mTEC subpopulations. Because of their limited cellularity, however, the biochemical characterization of TECs, including the proteomic profiling of cTECs and mTECs, has remained unestablished. Utilizing genetically modified mice that carry enlarged but functional thymuses, here we show a combination of proteomic and transcriptomic profiles for cTECs and mTECs, which identified signature molecules that characterize a developmental and functional contrast between cTECs and mTECs. Our results reveal a highly specific impact of the thymoproteasome on proteasome subunit composition in cTECs and provide an integrated trans-omics platform for further exploration of thymus biology.

## INTRODUCTION

The thymus is a pharyngeal epithelial organ that produces T cells, which play a central role in the immune system to protect our bodies from infectious agents and transformed malignancies. The T-cell-producing function of the thymus is chiefly mediated by thymic epithelial cells (TECs) and their subpopulations (Boehm 2008; Blackburn and Manley, 2004; Rodewald, 2008). Cortical TECs (cTECs)—which structurally constitute the thymic cortex—induce the differentiation of hematopoietic progenitor cells to the T-lymphoid lineage and promote the positive selection of functionally competent T cells, whereas medullary

TECs (mTECs)—which primarily form the medullary region of the thymus—attract positively selected T cells from the cortex and install self-tolerance in positively selected T cells by deleting self-reactive T cells and promoting the generation of regulatory T cells (Anderson and Takahama, 2012; Derbinski and Kyewski, 2010; Takahama et al., 2017).

Unbiased transcriptomic analysis has powerfully advanced our understanding of the biology of TECs. Global gene expression analysis has identified promiscuous gene expression in mTECs (Anderson et al., 2002; Derbinski et al., 2005; Sansom et al., 2014; Miller et al., 2018), and single-cell RNA sequencing analysis has revealed an enormous diversity in mTEC subpopulations, including the recently described thymic tuft cells (Meredith et al., 2015; Bornstein et al., 2018). In addition to transcriptomic analysis, proteomic analysis is an unbiased and powerful approach to gain insight into the molecular basis for cellular development and functions. Proteomic profiling of cTECs and mTECs is particularly interesting because these self-antigen-presenting cells possess distinct machinery of protein processing and peptide presentation to coordinately shape the immunocompetent and self-tolerant TCR repertoire in T cells (Anderson and Takahama, 2012; Klein et al., 2014; Kondo et al., 2019). In contrast to transcriptomic analysis, however, proteomic analysis has not been established in TECs and their subpopulations. This is in part due to the necessity of a large number of cells for mass spectrometric proteomic analysis (i.e., typically  $>5 \times 10^5$  cells in one run), despite the limited availability of mouse TEC cellularity (e.g., typically  $<5 \times 10^3$  cTECs sorted from one mouse) and the loss of functionally relevant molecules in the monolayer propagation of TEC lines.

In the present study, we utilized a genetically modified mouse that carries an enlarged thymus to overcome the limited availability of TECs for proteomic analysis. The keratin 5 promoter-driven epithelial cell-specific expression of cyclin D1 causes epidermal proliferation and severe thymic hyperplasia (Robles et al., 1996). The cyclin D1 expression in keratin 5-expressing

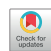

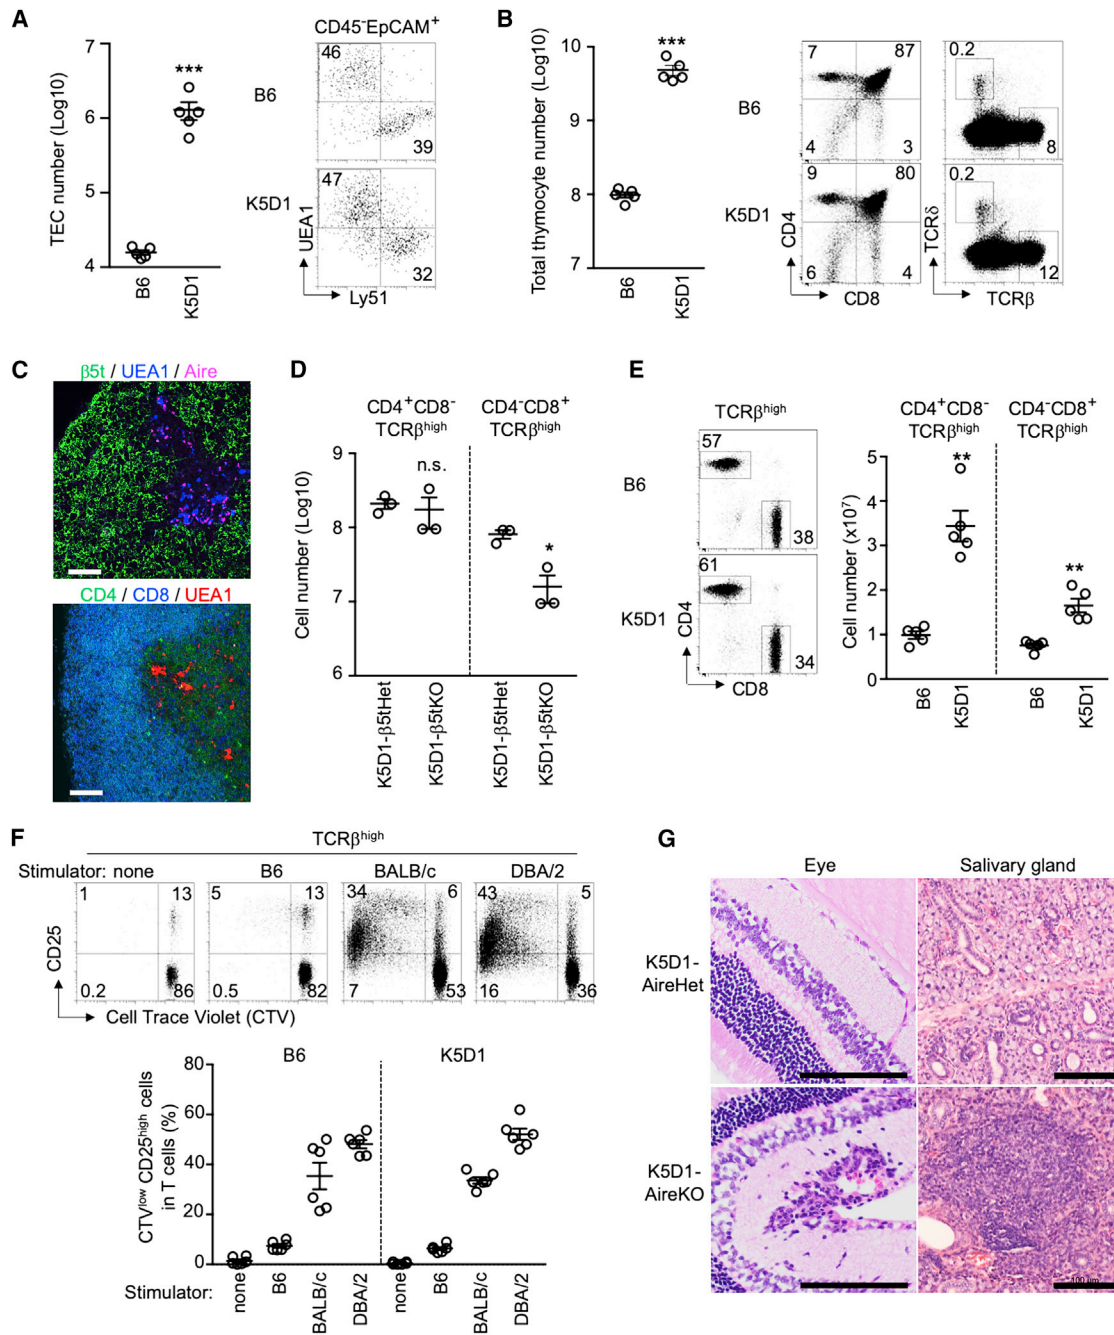

**Figure 1. K5D1 Thymus Produces Functionally Competent and Self-Tolerant T Cells**

(A) Flow cytometric analysis of TECs from B6 and K5D1 mice. Plots on the left show the number (means and SEMs, n = 5) of CD45<sup>+</sup> EpCAM<sup>+</sup>PI<sup>-</sup> viable TECs. Dot plots on the right show UEA1 and Ly51 expression profiles of CD45<sup>+</sup> EpCAM<sup>+</sup>PI<sup>-</sup> viable TECs.

(B) Flow cytometric analysis of thymocytes from B6 and K5D1 mice. Plots on the left show the number (means and SEMs, n = 5) of total thymocytes. Dot plots on the right show CD4 and CD8 expression (left) and TCR $\beta$  and TCR $\delta$  expression (right) in PI<sup>-</sup> viable thymocytes.

(C) Immunofluorescence analysis of thymic sections from K5D1 mice. Top:  $\beta$ 5t (green), UEA1 reactivity (blue), and Aire (magenta). Bottom: CD4 (green), CD8 (blue), and UEA1 reactivity (red). Representative data from three independent experiments are shown. Scale bars, 100  $\mu$ m.

(D) Flow cytometric analysis of thymocytes from K5D1- $\beta$ 5t<sup>Het</sup> heterozygous (Het) and K5D1- $\beta$ 5t<sup>KO</sup> knockout (KO) mice. Plots show cell number (means and SEMs, n = 3) of CD4<sup>+</sup>CD8<sup>-</sup> TCR $\beta$ <sup>high</sup> and CD4<sup>-</sup>CD8<sup>+</sup> TCR $\beta$ <sup>high</sup> thymocytes.

(E) Flow cytometric analysis of spleen cells from B6 and K5D1 mice. Dot plots on the left show CD4 and CD8 expression in TCR $\beta$ <sup>high</sup> PI<sup>-</sup> viable cells. Plots on the right show cell number (means and SEMs, n = 5) of CD4<sup>+</sup>CD8<sup>-</sup> TCR $\beta$ <sup>high</sup> and CD4<sup>-</sup>CD8<sup>+</sup> TCR $\beta$ <sup>high</sup> cells.

(legend continued on next page)

TEC progenitors causes a massive enlargement of the thymus by increasing the cellularity of TECs (Klug et al., 2000). Importantly, the enlarged thymus maintains the corticomedullary structure and the capability to produce T cells (Robles et al., 1996; Klug et al., 2000; Bolner, 2015). We show that cTECs and mTECs in the enlarged thymuses of these mice are massively expanded in cellularity yet are functionally potent in supporting the development and selection of immunocompetent and self-tolerant T cells. RNA sequencing analysis verifies the developmental fidelity and functional potency of cTECs and mTECs isolated from keratin 5 promoter-driven cyclin D1-transgenic mice. By performing mass-spectrometry-based quantitative proteomic analysis of cTECs and mTECs in these mice, and in combination with RNA sequencing analysis of these cells, our integrated multi-layer omics data identify signature molecules that characterize a developmental and functional contrast between cTECs and mTECs.

By using the multi-layer omics (i.e., trans-omics) approach for the analysis of isolated TEC subpopulations, we further examined the proteomic as well as transcriptomic profiles of cTECs from  $\beta 5t$ -deficient mice.  $\beta 5t$  is a cTEC-specific component of the thymoproteasome, which is essential for the optimal production of immunocompetent  $CD8^+$  T cells (Murata et al., 2007; Nitta et al., 2010; Xing et al., 2013; Takada et al., 2015). It is speculated that MHC class-I-associated self-peptides produced in a cTEC-specific manner by  $\beta 5t$ -containing thymoproteasome govern the positive selection of  $CD8^+$  T cells in the thymic cortex (Murata et al., 2007, 2018; Sasaki et al., 2015). However, it is still unclear how  $\beta 5t$  contributes to the optimization of  $CD8^+$  T-cell development. Specifically, it is uncertain whether  $\beta 5t$  alters the proteome and/or the transcriptome of cTECs to pervasively affect cellular functions of cTECs, in addition to providing the proteasomal uniqueness in the production of MHC class-I-associated unique self-peptides. Our trans-omics analysis reveals a highly specific impact of  $\beta 5t$  on proteasomal subunit composition in cTECs, rather than a pervasive effect on cTEC functions, supporting the possibility that a  $\beta 5t$ -containing thymoproteasome governs  $CD8^+$  T-cell development through the proteasomal production of MHC class-I-associated unique self-peptides in cTECs.

## RESULTS

### Hyperplastic Thymuses in Keratin 5 Promoter-Driven Cyclin D1-Transgenic Mice Are Capable of Producing and Selecting Functionally Competent and Self-Tolerant T Cells

It was reported that the thymuses in keratin 5 promoter-driven cyclin D1-transgenic (K5D1) mice were severely hyperplastic while maintaining the corticomedullary structure and the T-cell-producing capability (Robles et al., 1996; Klug et al., 2000; Bolner, 2015). We found that the enlarged thymuses in K5D1 mice

contained approximately 80- to 100-fold larger numbers of TECs compared with the thymuses in age-matched control B6 mice (Figure 1A). The flow cytometric profiles of  $Ly51^+ UEA1^-$  cTECs and  $Ly51^- UEA1^+$  mTECs in K5D1 thymuses were similar to those in B6 thymuses (Figures 1A and S1A). Accordingly, thymocyte cellularity in K5D1 mice increased to approximately 30- to 50-fold of that in B6 mice, without apparent alterations in  $CD4/CD8$  and  $TCR\beta/TCR\delta$  profiles (Figure 1B). Similar to B6 thymuses, the cortical regions in the enlarged K5D1 thymuses were enriched with  $\beta 5t^+$  cTECs and  $CD4/CD8$  double-positive thymocytes, and the K5D1 thymic medullas contained  $Aire^+$  mTECs as well as  $CD4/CD8$  single-positive thymocytes (Figure 1C). The  $\beta 5t^+$  cTECs in K5D1 mice were functionally potent to optimize  $CD8^+$  T-cell production because  $CD4^- CD8^+ TCR\beta^{high}$  thymocytes were significantly reduced in cellularity in  $\beta 5t^{-/-}$  K5D1 mice, in comparison with  $\beta 5t^{+/-}$  K5D1 mice (Figure 1D). The thymic hyperplasia in K5D1 mice coincided with an approximately 2- to 3-fold increase in the cellularity of T cells in the spleen (Figure 1E). Those spleen T cells were functionally competent to proliferate in response to allogeneic stimulator cells, but they were self-tolerant because they were unresponsive to syngeneic stimulator cells (Figure 1F). The deficiency in  $Aire$ , which controls a variety of mTEC functions including the ectopic expression of organ-specific self-antigens (Mathis and Benoist, 2009), in K5D1 mice resulted in the inflammation in various tissues, including the retinas and the salivary glands (Figure 1G), indicating that  $Aire^+$  mTECs play a role in the establishment of self-tolerance in T cells in K5D1 mice.

These results indicate that the hyperplastic thymic microenvironments, including the massively increased cellularities of cTECs and mTECs, in K5D1 mice are functionally capable of producing and selecting immunocompetent and self-tolerant T cells. These results also suggest that the thymuses in K5D1 mice could be a useful source of cTECs and mTECs for biochemical analysis, including proteomic analysis that requires relatively large-scale cell preparation.

### Isolation of cTECs and mTECs from K5D1 Mice

We then isolated cTECs and mTECs from an enlarged K5D1 thymus for transcriptomic and proteomic analyses. According to the most widely used method for TEC purification (Gray et al., 2006; Sansom et al., 2014; Meredith et al., 2015; Miller et al., 2018; Bornstein et al., 2018; Anderson et al., 1993; Sakata et al., 2018), the K5D1 thymus and control B6 thymus were enzymatically digested, and cTECs and mTECs were purified simultaneously using magnetic enrichment followed by flow cytometric cell sorting. In comparison with the previous results (Sakata et al., 2018), cTECs and mTECs distributed similarly (Figures S1B–S1D) and were isolated in an equivalent efficiency (Figure S1E) between K5D1 and B6 thymuses. Microscopic inspection of the highly purified cTECs and mTECs (Figures 2A and S2)

(F) Allogeneic response of spleen T cells from B6 and K5D1 mice. Cell Trace Violet (CTV)-labeled splenocytes were cultured with stimulator cells for 6 days. Dot plots on the left show CTV fluorescence and CD25 expression in  $TCR\beta^{high}$  viable cells from K5D1 mice cultured with indicated stimulator cells. Plots on the right show the frequency (means and SEMs,  $n = 6$ ) of  $CTV^{low} CD25^{high}$  cells in  $TCR\beta^{high}$  viable cells from B6 mice (left) and K5D1 mice (right). Numbers in dot plots indicate frequency of cells within indicated area.

(G) Hematoxylin- and eosin-stained sections of eyes and salivary glands from indicated mice. Bars, 100  $\mu m$ . Mice were analyzed at 10 to 20 weeks old in an age-matched manner. \* $p < 0.05$ ; \*\* $p < 0.01$ ; \*\*\* $p < 0.001$ ; n.s., not significant.



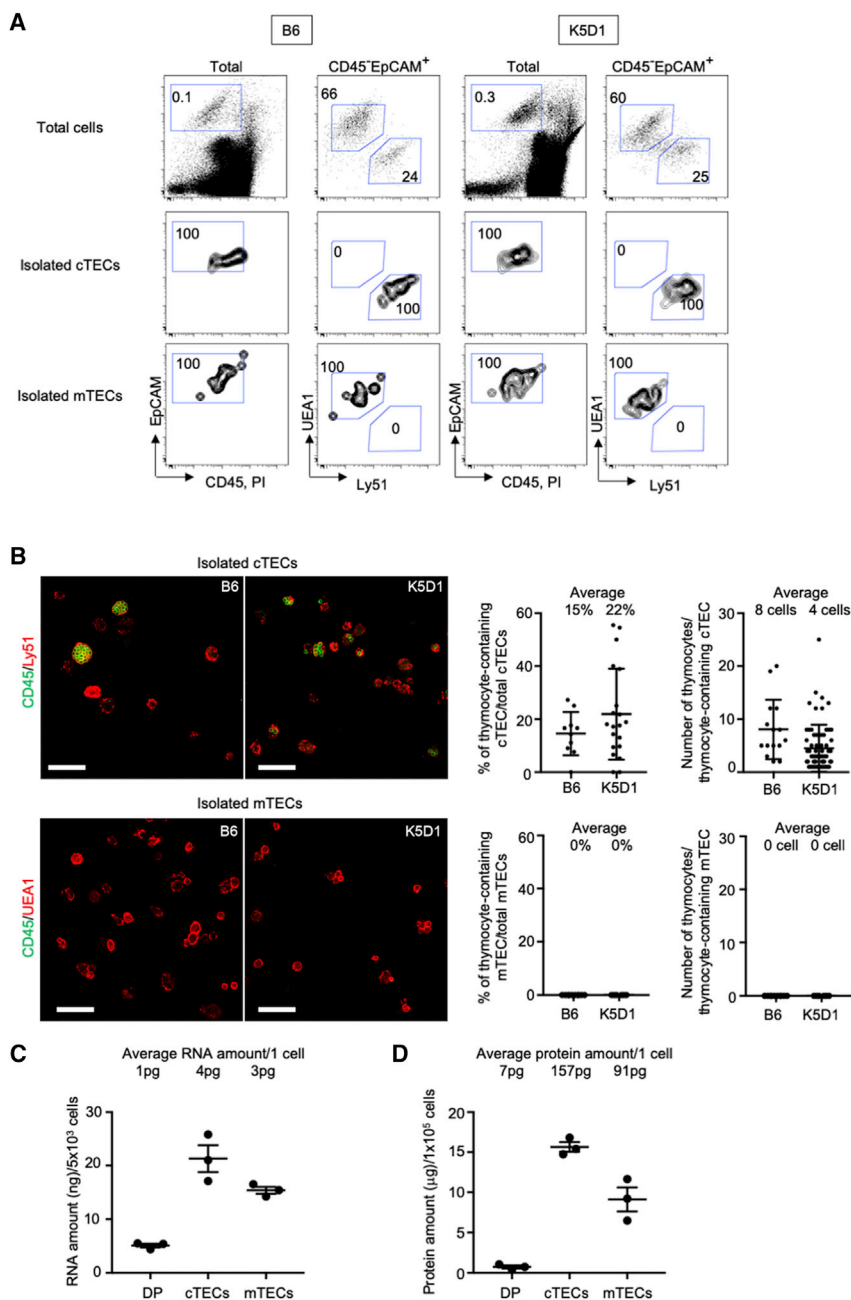

**Figure 2. Isolated cTECs but not mTECs Contain Thymic Nurse Cells**

(A) Flow cytometric analysis of enzyme-digested total thymic cells (top), CD45<sup>+</sup>EpCAM<sup>+</sup>UEA1<sup>-</sup>Ly51<sup>+</sup> isolated cTECs (middle), and CD45<sup>+</sup>EpCAM<sup>+</sup>UEA1<sup>+</sup>Ly51<sup>-</sup> isolated mTECs (bottom) from B6 and K5D1 mice. Shown are profiles of EpCAM and CD45+PI expression in total cells (left) and UEA1 reactivity and Ly51 expression in PI<sup>-</sup>CD45<sup>+</sup>EpCAM<sup>+</sup> viable cells (right). Numbers in dot plots indicate frequency of cells within indicated area.

(B) Confocal microscopic analysis of isolated cTECs and mTECs. Cells were fixed, permeabilized, and stained for CD45. Shown on the left are representative images of CD45<sup>+</sup> thymocytes (green) in Ly51<sup>+</sup> cTECs (top) and UEA1<sup>+</sup> mTECs (bottom) isolated from B6 mice (left) and K5D1 mice (right). Left plots show the frequency of thymocyte-containing cTECs (top) and mTECs (bottom) in total cTECs and mTECs, respectively. Numbers show average frequencies. Right plots show the number of thymocytes in thymocyte-containing cTEC (top) and mTEC (bottom). Numbers show average thymocyte numbers. Means and SEMs from 10 to 20 images in two independent experiments are shown.

(C) Fluorometric measurement of RNA amount (means and SEMs, n = 3) per 5 × 10<sup>3</sup> flow-cytometry-isolated CD4<sup>+</sup>CD8<sup>+</sup> (DP) thymocytes, cTECs, and mTECs from K5D1 mice. Numbers (pg) show deduced average RNA amount per cell.

(D) Fluorometric measurement of protein amount (means and SEMs, n = 3) per 1 × 10<sup>5</sup> flow-cytometry-isolated CD4<sup>+</sup>CD8<sup>+</sup> (DP) thymocytes, cTECs, and mTECs from K5D1 mice. Numbers (pg) show deduced average protein amount per cell.

were inevitably co-purified with cTECs that were purified on the basis of cell-surface molecules. Unlike cTECs, however, mTECs did not form multicellular complexes with thymocytes (Figure 2B).

Consequently, we estimated the contribution of TNC-enclosed CD4<sup>+</sup>CD8<sup>+</sup> thymocytes in RNA and protein samples prepared from cTECs. Fluorometric measurements indicated that 21.3 ± 2.5 ng (n = 3) and 5.1 ± 0.4 ng (n = 3) of RNAs could be extracted from 5 × 10<sup>3</sup> flow-cytometry-purified cTECs and CD4<sup>+</sup>CD8<sup>+</sup>

revealed that 15% and 22% of cTECs isolated from the B6 and K5D1 thymuses, respectively, were multicellular complexes, in which the cTECs enclosed four to eight CD4<sup>+</sup>CD8<sup>+</sup> thymocytes (Figure 2B). These multicellular cTEC-thymocyte complexes, previously described as thymic nurse cells (TNCs), resulted from persistent interactions between a fraction of cTECs and long-lived CD4<sup>+</sup>CD8<sup>+</sup> thymocytes (Wekerle and Ketelsen, 1980; Kyewski and Kaplan, 1982; Nakagawa et al., 2012). The CD4<sup>+</sup>CD8<sup>+</sup> thymocytes in the TNC complexes were completely enclosed within large cTECs (Wekerle and Ketelsen, 1980; Kyewski and Kaplan, 1982; Nakagawa et al., 2012) and therefore

thymocytes, respectively (Figure 2C), which deduced 4.3 ± 0.5 pg and 1.0 ± 0.1 pg of RNAs from one cTEC and one CD4<sup>+</sup>CD8<sup>+</sup> thymocyte, respectively (Figure 2C). Because the isolated cTECs from either K5D1 or B6 mice included 15% to 22% of TNC complexes containing four to eight CD4<sup>+</sup>CD8<sup>+</sup> thymocytes (Figure 2B), we estimated from simple calculation (RNA amount per one CD4<sup>+</sup>CD8<sup>+</sup> thymocyte × the number of CD4<sup>+</sup>CD8<sup>+</sup> thymocytes per one TNC × the frequency of TNCs per total cTECs / RNA amount measured in one cTEC) that 73% to 80% of RNAs extracted from the isolated cTECs were indeed derived from cTECs, and the rest (20% to 27%) of those

RNAs were actually derived from TNC-enclosed CD4<sup>+</sup>CD8<sup>+</sup> thymocytes (Figure 2C). From similar fluorometric measurements of the amounts of proteins extracted from isolated cTECs and CD4<sup>+</sup>CD8<sup>+</sup> thymocytes, we deduced that 95% to 97% of proteins extracted from the isolated cTECs were derived from cTECs, and the rest (3% to 5%) of those proteins from the isolated cTECs were derived from TNC-enclosed CD4<sup>+</sup>CD8<sup>+</sup> thymocytes (Figure 2D). The difference in the contribution of CD4<sup>+</sup>CD8<sup>+</sup> thymocytes to RNA compared to protein correlated with the difference in fold change in protein amount and RNA amount between large cTECs and small CD4<sup>+</sup>CD8<sup>+</sup> thymocytes (Figure 2D).

These results demonstrate that we can isolate cTECs and mTECs at a high purity from K5D1 mice. However, current technologies for TEC purification inevitably include TNC complexes in the isolated cTECs. In both K5D1 and B6 cTECs, it was estimated that 20% to 27% of RNA and 3% to 5% of proteins extracted from the isolated cTECs were actually derived from TNC-enclosed CD4<sup>+</sup>CD8<sup>+</sup> thymocytes. On the contrary, mTECs did not form those multicellular complexes with thymocytes and therefore could be isolated free from thymocytes.

### RNA Sequencing Analysis of cTECs and mTECs Isolated from K5D1 Mice

By using the replicates ( $n = 3$ ) of these highly purified cells (Figure S2), we next examined the transcriptomic profiles of isolated cTECs and mTECs from an enlarged K5D1 thymus by RNA sequencing analysis. All experimental replicates were sequenced at approximately  $2 \times 10^7$  reads for  $1.5$  to  $2 \times 10^4$  genes per sample (Figure S3A). The number of genes detected was larger in mTECs than in cTECs (Figure S3B), in agreement with previously reported results (Sansom et al., 2014) and likely reflecting promiscuous gene expression in mTECs (Anderson et al., 2002; Derbinski et al., 2005; Sansom et al., 2014). Unsupervised hierarchical cluster analysis validated the experimental replicates, all of which were closely clustered with each other (Figure 3A). We found that the global profiles of gene expression were highly distinct between cTECs and mTECs (Figure 3A), in agreement with previous reports (Sansom et al., 2014; Heng et al., 2008; Immunological Genome Project, <http://www.immgen.org>). Importantly, those profiles were very similar between K5D1 and B6 cells (Figure 3A). Principal component analysis confirmed differences in gene expression profiles between cTECs and mTECs and the similarities between K5D1 and B6 cells (Figure 3B). The correlation plot of the fold changes between mTEC signals and cTEC signals further pointed to the sharp contrast between cTECs and mTECs and the strong similarity between K5D1 and B6 cells in the gene expression profiles (Figure 3C). Comparable distribution in the mTEC/cTEC fold changes among individual samples further highlighted the similarity in global gene expression between K5D1 and B6 cells (Figure S3C).

The minor difference in mTEC genes between K5D1 and B6 mice, which was detected in the secondary principal components (Figure 3B), was primarily due to the overexpressed *Ccnd1*, encoding cyclin D1, and other cell-cycle-associated genes, including *Ccnb1* (encoding cyclin B1), *Ccna2* (cyclin A2), and *Fbxo5* (F-box protein 5), more strongly expressed in

K5D1 mTECs than in B6 mTECs (Figure 3D). Gene Ontology enrichment analysis confirmed that differentially expressed genes between B6 mTECs and K5D1 mTECs were involved in the cell cycle, mitotic nuclear division, and cell division (Figure 3D). *Ccnd1* was also overexpressed in cTECs in K5D1 mice, but the overexpression of the other cell-cycle-associated genes was not clearly highlighted in K5D1 cTECs (Figure 3E), possibly because the keratin 5 promoter-driven gene expression is less pronounced in cTECs than in mTECs and cTEC/mTEC-bipotent TEC progenitors (Klug et al., 1998) and because cTECs are less proliferative than mTECs (Gray et al., 2006). Instead, the Gene Ontology enrichment analysis revealed that the minor difference in cTEC genes between K5D1 and B6 mice (Figure 3B) predominantly resulted from the difference in the expression of adaptive immune-cell-associated genes, including *Rag2* (*RAG2*), *Zap70* (*ZAP70*), and *Cd8a* (*CD8 $\alpha$* ), which were detected more in B6 cTECs than in K5D1 cTECs (Figure 3E); this coincides with the slightly higher frequency of CD4<sup>+</sup>CD8<sup>+</sup> thymocytes enclosed in isolated B6 TNCs (eight thymocytes in 15% cTECs) than in isolated K5D1 cTECs (four thymocytes in 22% cTECs) (Figure 2B).

The expression profiles of genes that were associated with the unique functions of cTECs (e.g., *Ctsl* [cathepsin L], *Dll4* [DLL4], *Psmb11* [ $\beta$ 5t], and *Prss16* [TSSP]) and mTECs (e.g., *Xcl1* [XCL1], *Ccl21a* [CCL21Ser], *Tnfrsf11a* [RANK], *Tnfrsf11b* [OPG], and *Aire* [AIRE]) were markedly different between cTECs and mTECs but were indistinguishable between the cells prepared from K5D1 mice and those from B6 mice (Figure 3F). The genes that were highly detected in mTECs over cTECs included Aire-dependent and Aire-independent promiscuously expressed genes, encoding tissue-restricted self-antigens (Figure 3G).

These results indicate that the global profiles of gene expression in cTECs and mTECs isolated from K5D1 mice are very similar to those from B6 mice, except for the overexpressed cyclin D1 and the consequent expression of cell-cycle-associated genes. Our results also reconfirm the previously described sharp contrast in gene expression profiles between cTECs and mTECs. The genes detected in isolated cTECs inevitably include TNC-enclosed CD4<sup>+</sup>CD8<sup>+</sup> thymocyte-derived genes, which were also detected in isolated cTECs in previous reports (Sansom et al., 2014; Immunological Genome Project, <http://www.immgen.org>).

### Proteomic and Trans-omics Analyses of cTECs and mTECs

Because the use of K5D1 mice allowed us to readily collect  $>10^5$  cTECs and  $>10^5$  mTECs per mouse (Figure 1), and because the functional and transcriptomic profiles of cTECs and mTECs isolated from K5D1 mice were highly similar to those from B6 mice (Figures 1 and 3), we next performed mass-spectrometry-based quantitative proteomic analysis of cTECs and mTECs isolated from K5D1 mice. Proteins extracted from isolated cTECs and mTECs were digested with trypsin, and the peptides were labeled with tandem mass tags (TMTs). A high-confidence analysis at 1% false discovery rate (FDR) of liquid chromatography-tandem mass spectrometry (LC-MS/MS) profiles identified and quantified 5,753 protein species from cTECs and mTECs

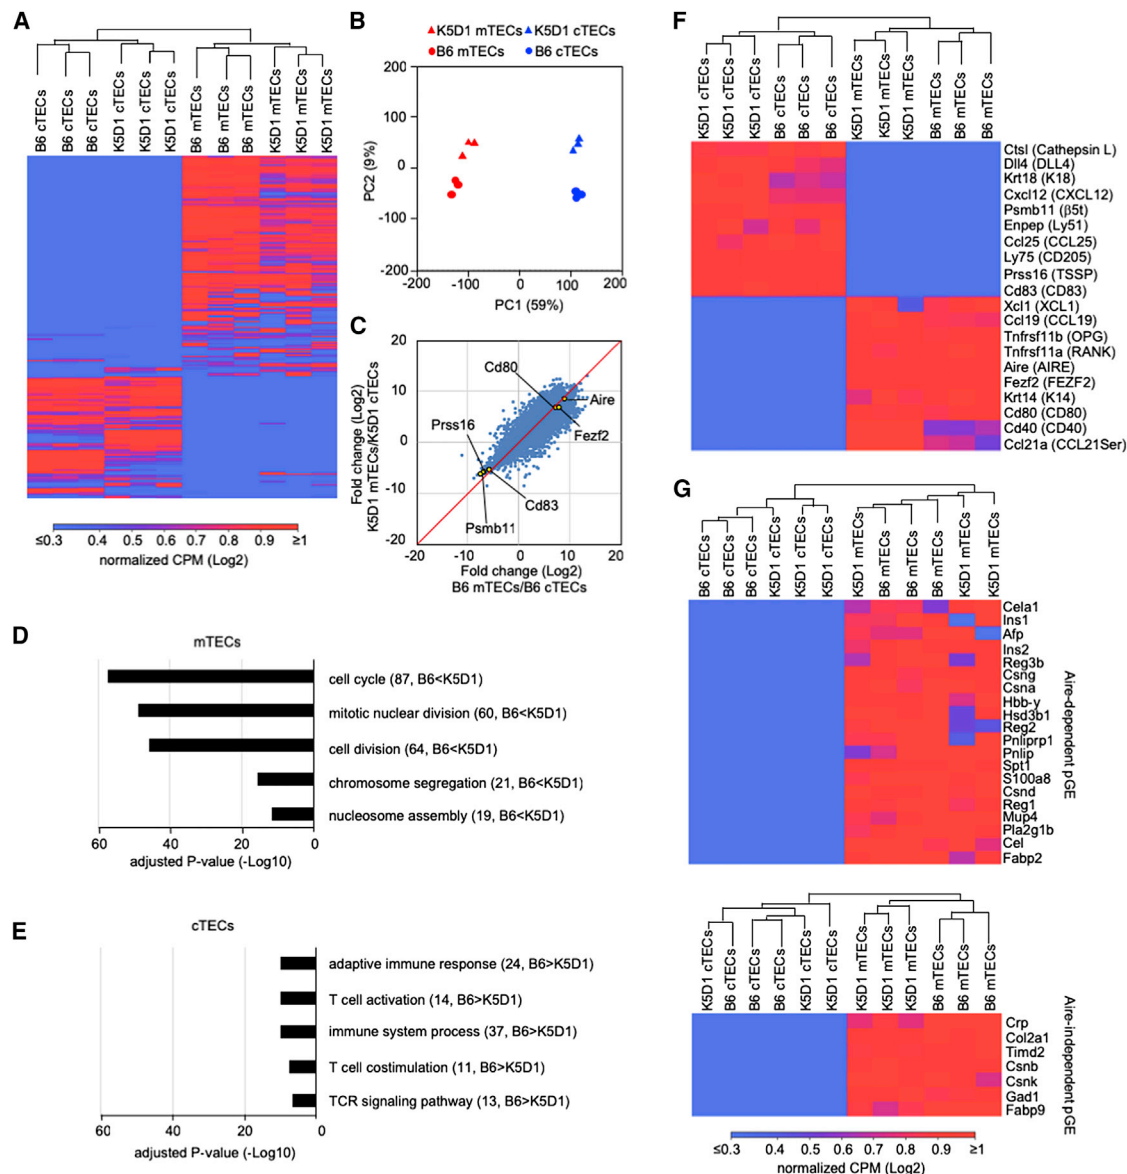

**Figure 3. RNA Sequencing Analysis of cTECs and mTECs**

(A) Unsupervised hierarchical cluster analysis and heatmap for detected genes in cTECs and mTECs (n = 3) isolated from B6 mice and K5D1 mice.

(B) Principal component (PC) analysis of RNA sequencing data of indicated cell populations.

(C) Correlation plot analysis of the transcriptome according to log<sub>2</sub> fold change (mTECs/cTECs) between B6 and K5D1 TECS.

(D and E) Enrichment analysis of the ontology for genes that are differentially expressed (RPKM > 1, log<sub>2</sub> fold change > 1 or < -1, Q < 0.05) between B6 and K5D1 TECS. Bars show the adjusted p values of top 5 categories enriched in mTECs (D) and cTECs (E). Numbers in parentheses indicate the number of categorized genes.

(F) Unsupervised hierarchical cluster analysis and heatmap of genes that are associated with the unique functions of cTECs and mTECs.

(G) Unsupervised hierarchical cluster analysis and heatmap of Aire-dependent (top) and Aire-independent (bottom) promiscuously expressed genes. pGE, promiscuous gene expression.

isolated from K5D1 mice (Table S1). We found a sharp contrast between cTECs and mTECs in their proteomic profiles, including the cTEC-specific detection of cathepsin L,  $\beta$ 5t, and TSSP proteins, which characterize functions unique to cTECs, and the mTEC-specific detection of cathepsin S, AIRE, and CD40 proteins, which characterize mTEC functions (Figure 4A).

In agreement with our findings that 3% to 5% of proteins extracted from isolated cTECs were derived from TNC-enclosed CD4<sup>+</sup>CD8<sup>+</sup> thymocytes, whereas 20% to 27% of RNAs extracted from isolated cTECs originated from TNC-enclosed CD4<sup>+</sup>CD8<sup>+</sup> thymocytes (Figure 2), the proteomic profiles of cTECs were not as much affected by the co-isolated

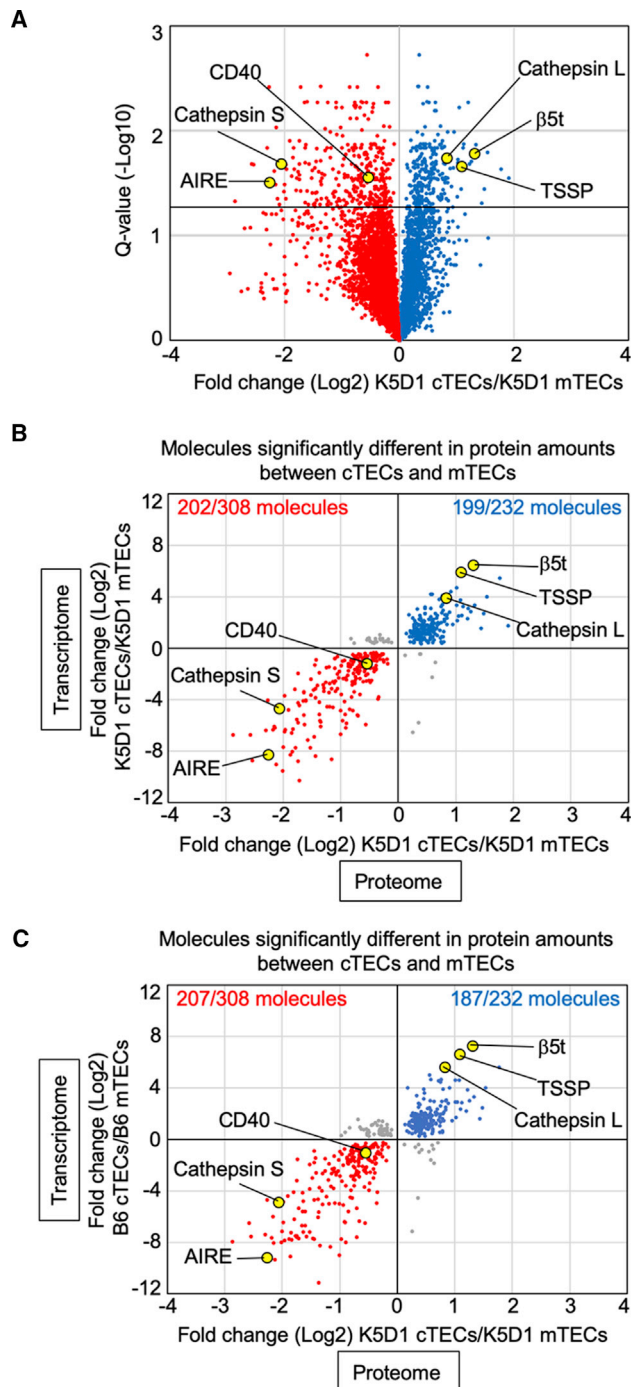

**Figure 4. Proteomic and Trans-omics Analyses of cTECs and mTECs**

(A) Volcano plot analysis of TMT-based quantitative proteomes for cTECs and mTECs. Detected proteins are plotted as log<sub>2</sub> fold changes (K5D1 cTECs/K5D1 mTECs) versus  $-\log_{10}$  Q values. Black horizontal line in the plot shows the Q value of 0.05.

(B and C) Correlation plot analysis of trans-omics profiles for cTECs and mTECs. Log<sub>2</sub> fold changes of proteins differently ( $Q < 0.05$ ) expressed between K5D1 cTECs and K5D1 mTECs are plotted against transcriptomic log<sub>2</sub> fold changes between K5D1 cTECs and K5D1 mTECs (B) and B6 cTECs and

CD4<sup>+</sup>CD8<sup>+</sup> thymocyte-derived proteins as were the transcriptomic profiles of cTECs (Figure S4A).

The top five proteins most abundantly detected in all TECs were kynureninase, cathepsin H, glutathione S-transferase  $\alpha$ 2, loricrin, and hornerin, all of which were relatively more abundant in mTECs than in cTECs (Table S1). The top five proteins most highly abundant in cTECs were  $\beta$ 5t, indolethylamine N-methyltransferase, parvin  $\beta$ , NAD(P)H quinone dehydrogenase 1, and CD83 (Table S1).

Among the 27 promiscuously expressed tissue-restricted self-antigen genes detected in mTECs (Figure 3G), only two protein products were detected in mTECs in the proteomic analysis: Aire-dependent *Hbb-y* and Aire-independent *Fabp9* (Table S1). The rest of these genes did not produce a detectable amount of proteins (Table S1).

This quantitative proteomic analysis identified 308 proteins that were significantly ( $Q < 0.05$ ) more abundant in mTECs than in cTECs, and the combined multi-layer analysis with transcriptomic data revealed that 202 of those 308 molecules also showed significantly ( $Q < 0.05$ ) higher mRNA expression in mTECs than in cTECs (Figure 4B). These molecules included nuclear proteins important for mTEC development, such as Aire, relB, and NF $\kappa$ B2, as well as the recently described thymic tuft cell-associated proteins, such as DCLK1, Avil, and Trpm5 (Table S2). The rest of the molecules ( $308 - 202 = 106$  proteins) that had significantly ( $Q < 0.05$ ) higher protein expression, but not mRNA expression, in mTECs compared to cTECs included proteins with previously unknown roles in mTECs, although no clear enrichment was detected in the ontology for any biological process or cellular localization (Table S3).

On the contrary, among 232 molecules that were significantly ( $Q < 0.05$ ) more abundant in cTECs than in mTECs, 199 proteins showed a significantly higher abundance in mRNA transcripts in cTECs than in mTECs (Figure 4B), which included proteolytic proteins important for cTEC functions, such as  $\beta$ 5t, TSSP, and cathepsin L (Table S2). The rest of the molecules ( $232 - 199 = 33$  proteins) that had significantly ( $Q < 0.05$ ) higher protein expression, but not mRNA expression, in cTECs than in mTECs contained proteins with previously unknown roles in cTECs, without the enrichment of molecules in certain biological processes or cellular localization (Table S3).

In parallel, the combined multi-layer analysis of proteomic data from K5D1 TECs and transcriptomic data from B6 TECs revealed that 207 of the 308 molecules that had significantly ( $Q < 0.05$ ) higher protein expression in mTECs than in cTECs in K5D1 mice showed significantly ( $Q < 0.05$ ) higher mRNA expression in mTECs than cTECs in B6 mice, whereas 187 of the 232 molecules that had significantly ( $Q < 0.05$ ) higher protein expression in cTECs than in mTECs in K5D1 mice showed significantly ( $Q < 0.05$ ) higher mRNA expression in cTECs than in mTECs in

B6 mTECs (C). Among the 308 molecules that are significantly ( $Q < 0.05$ ) more abundant in mTECs than in cTECs in proteomic analysis, 202 (B) and 207 (C) molecules (red symbols) are more highly detected in mTECs than in cTECs in transcriptomic data. Among the 232 molecules that are significantly ( $Q < 0.05$ ) more abundant in cTECs than mTECs in proteomic analysis, 199 (B) and 187 (C) molecules (blue symbols) are more highly detected in cTECs than in mTECs in transcriptomic data.



B6 mice (Figure 4C). More than 90% (90.5% for cTECs and 92.3% for mTECs) of the molecules overlapped between the trans-omics plots using K5D1 transcriptomic profiles and the plots using B6 transcriptomic profiles (Figures 4B and 4C), reconfirming the relevance of proteomic and trans-omic profiles obtained from K5D1 TECs.

We also analyzed the molecules that were differentially detected in mRNAs but not proteins between cTECs and mTECs. We noticed that 2,989 molecules, which were significantly ( $Q < 0.05$ ) more abundant in mTECs than cTECs in RNA sequencing analysis but were not detected in proteomic analysis, were highly enriched with the molecules with extracellular localization, including cytokines and chemokines such as CCL21Ser, XCL1, and IL25 (Figure S4B; Table S4). This likely reflects the removal of those secretory proteins from mTECs during single-cell preparation digested out of the thymus for proteomic and transcriptomic analyses. We also detected 1,070 kinds of mRNA transcripts that were significantly ( $Q < 0.05$ ) more abundant in cTECs than in mTECs in RNA sequencing analysis but not in proteomic analysis (Table S4). The molecules that were detected abundantly only in either cTECs or mTECs in mRNAs, but not proteins, contained molecules with previously unknown roles in TECs, without showing highly biased enrichment in the ontology (Figure S4B; Table S4).

Thus, the combined proteomic and transcriptomic analyses (i.e., trans-omics analysis) identified a total of 401 molecules (202 molecules abundant in mTECs and 199 molecules in cTECs) whose mRNA and protein expression levels are significantly different between cTECs and mTECs. The results also identified many functionally unknown molecules that were detected in either cTEC or mTECs and were with discordant mRNA and protein abundance. The list of these molecules offers a useful resource for further exploring the biology of cTECs and mTECs.

### RNA Sequencing Analysis of cTECs Isolated from $\beta 5t$ -Deficient K5D1 Mice

We then examined the transcriptomic and proteomic profiles of cTECs isolated from  $\beta 5t$ -deficient K5D1 mice. The global profiles of gene expression in RNA sequencing analysis were highly similar between  $\beta 5t^{-/-}$  and  $\beta 5t^{+/+}$  cTECs isolated from either K5D1 or B6 cells (Figure S5A). The principal component analysis (Figure 5A) and the fold-change correlation analysis (Figure 5B) confirmed the high similarity between  $\beta 5t^{-/-}$  and  $\beta 5t^{+/+}$  cTECs isolated from either K5D1 or B6 cells. The minor difference between  $\beta 5t^{-/-}$  and  $\beta 5t^{+/+}$  cTECs detected in the principal component analysis (Figure 5A) was primarily due to the difference in the expression of *Psmb11*, encoding  $\beta 5t$  (Figure 5B). The difference in *Psmb11* expression was robust in the RPKM (reads per kilobase of transcript, per million mapped reads) values of the RNA sequencing analysis and clearly confirmed by qRT-PCR analysis (Figure 5C). Unlike *Psmb11*, all other genes that were found to be prominently different in the RNA sequencing analysis between  $\beta 5t^{-/-}$  and  $\beta 5t^{+/+}$  cTECs from either K5D1 or B6 mice were very low in the RPKM abundance, and the qRT-PCR analysis failed to reproduce the expression difference in most of those less abundant genes (Figure 5C). However, we noticed that the qRT-PCR analysis reproduced the differential expression in the functionally unknown gene *Gm2004* at a significantly

( $p < 0.05$ ) higher amount in  $\beta 5t^{-/-}$  cTECs than in  $\beta 5t^{+/+}$  cTECs (Figure 5C).

A recent study of RNA sequencing analysis reported that cTECs in  $\beta 5t^{-/-}$  mice had slightly (25% to 50%) reduced expression of cTEC genes, such as *Enpep*, *Ly75*, *Ctsl*, *Prss16*, *Cxcl12*, *Ccl25*, and *Dll4*, and interpreted that these reductions could reflect the acquisition of mTEC-like features by  $\beta 5t^{-/-}$  cTECs (Apavaloaei et al., 2019). However, none of the reported reductions in cTEC gene expression were reproduced in our data from RNA sequencing analysis or qRT-PCR measurement (Figures 5D and S5B). Some of the cTEC-associated transcripts, including *Ctsl* and *Ccl25*, were even slightly elevated in  $\beta 5t^{-/-}$  cTECs in qRT-PCR analysis (Figures 5D and S5B). In addition, unlike their description (Apavaloaei et al., 2019),  $\beta 5t^{-/-}$  cTECs showed neither the elevated expression of cell-adhesion-related genes—including *Itgam*, *Fndc1*, *Col3a1*, *Cdh13*, and *Cldn4* (Figures 5D and S5B)—nor the increased abundance in  $\beta$ -catenin proteins (Figure 5E). Furthermore, despite their description (Apavaloaei et al., 2019), our analysis of thymocytes from B6  $\beta 5t^{-/-}$  mice showed neither an increase in the number of MHC class I<sup>high</sup> CD69<sup>low</sup> TCR $\beta$ <sup>high</sup> CCR7<sup>high</sup> CD4<sup>+</sup>CD8<sup>-</sup> thymocytes (i.e., M2 CD4SP mature thymocytes) (Figures 5F and S5C) nor an increase in the expression of oxidative stress genes, including *Hspa1a*, *Hspa1b*, *Fos*, *Jun*, *Gadd45a*, *Rhob*, and *Nr4a2*, in TCR $\beta$ <sup>high</sup> CD4<sup>+</sup>CD8<sup>-</sup> mature thymocytes (Figure S5D).

These results indicate that the gene expression profiles of cTECs are highly similar between  $\beta 5t$ -deficient mice and control mice in B6 background. The pervasive effects reported in cTECs and CD4<sup>+</sup>CD8<sup>-</sup> thymocytes in  $\beta 5t$ -deficient mice (Apavaloaei et al., 2019) are not reproduced in our  $\beta 5t$ -deficient mice with B6 background and therefore cannot be generalized as a consequence of  $\beta 5t$  deficiency. Their results could have been derived from the use of mice with a mixed genetic background, the use of cTECs without clarifying the purity, and/or the focus on the small difference detected by RNA sequencing analysis without confirmation by quantitative mRNA measurement (Apavaloaei et al., 2019).

To further evaluate the impact of loss of cell-type-specific  $\beta 5$  subunits onto TECs, we also performed the RNA sequencing analysis of mTECs and cTECs from  $\beta 5i$ -deficient mice. The results showed similarities in gene expression profiles between TECs from B6- $\beta 5i$ -deficient mice and those from control B6 mice, indicating that the loss of  $\beta 5i$  does not pervasively affect basic gene expression profiles in either mTECs or cTECs (Figure S6).

### Alteration in Proteasome Components in cTECs in $\beta 5t$ -Deficient Mice

By the TMT-based quantitative proteomic analysis, we further examined cTECs isolated from  $\beta 5t$ -deficient K5D1 mice and control K5D1 mice. We noticed that the proteomic profiles of cTECs were highly similar between  $\beta 5t$ -deficient mice and control K5D1 mice (Figure 6A), in contrast to the marked difference detected in a parallel analysis between cTECs and mTECs (Figure 4A). Even though the analysis at the same stringency ( $Q < 0.05$ ) as the analysis of cTECs and mTECs (Figure 4A) pointed to no significantly different molecules between  $\beta 5t$ -deficient and control cTECs (Figure 6A), a relatively modest ( $Q < 0.4$ ) but

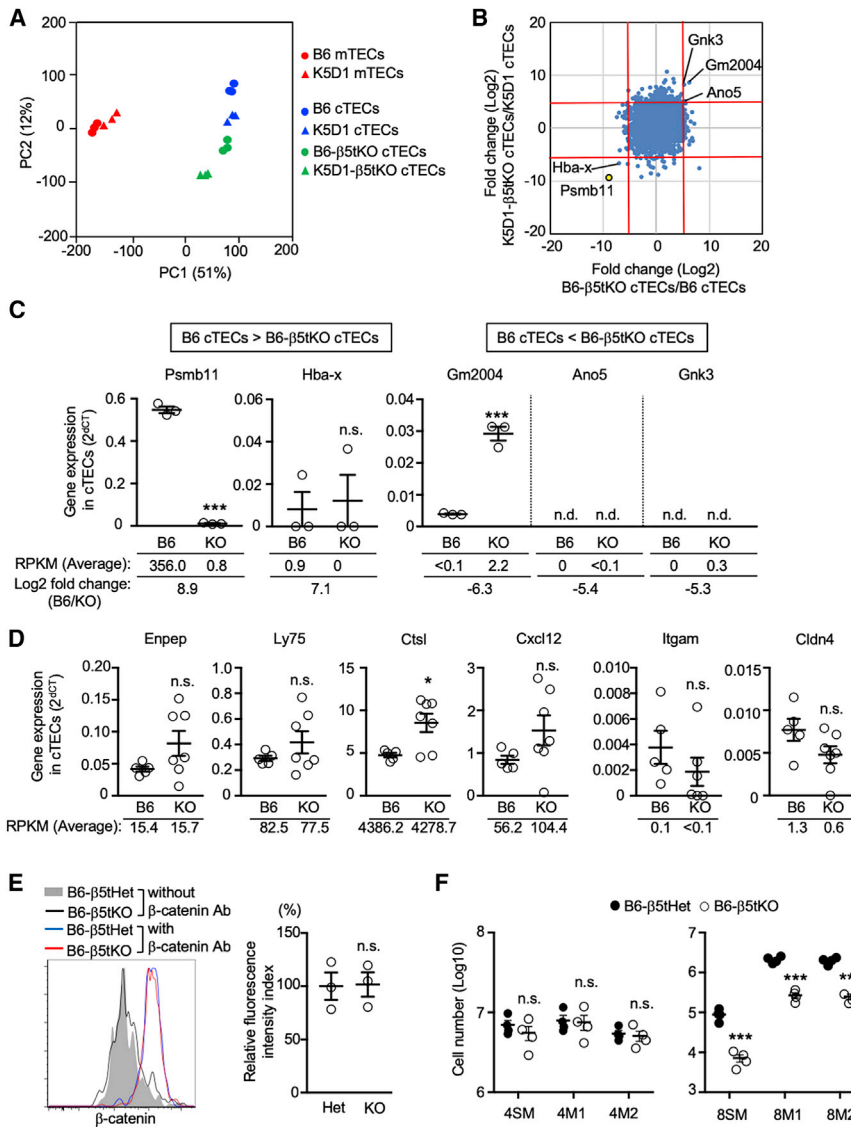

**Figure 5. RNA Sequencing Analysis of cTECs Isolated from  $\beta 5t$ -Deficient Mice**

(A) Principal component (PC) analysis of RNA sequencing data of indicated cell populations.  $\beta 5t$ KO,  $\beta 5t$ -knockout.

(B) Correlation plot analysis of transcriptome according to  $\log_2$  fold change ( $\beta 5t$ KO cTECs/control cTECs) between B6 and K5D1 cTECs. Red lines indicate  $-5$  and  $5$  of  $\log_2$  fold change.

(C) qPCR analysis of mRNA expression levels (means and SEMs,  $n = 3$ ) of indicated genes relative to *Gapdh* levels in cTECs isolated from B6 and B6- $\beta 5t$ KO mice. Numbers at the bottom of the plots show average RPKM values and  $\log_2$  fold change values (B6 cTECs/B6- $\beta 5t$ KO cTECs) of RNA sequencing data.

(D) qPCR analysis of mRNA expression levels (means and SEMs,  $n = 5$  to  $7$ ) of indicated genes relative to *Gapdh* levels in B6 and B6- $\beta 5t$ KO cTECs. Numbers at the bottom of the plots show average RPKM values of RNA sequencing data.

(E) Flow cytometric analysis of  $\beta$ -catenin expression in cTECs. Histograms show  $\beta$ -catenin expression in B6- $\beta 5t$ Het cTECs (blue line) and B6- $\beta 5t$ KO cTECs (red line). Shaded area and black line represent the fluorescence in the absence of anti- $\beta$ -catenin antibody in B6- $\beta 5t$ Het cTECs and B6- $\beta 5t$ KO cTECs, respectively. Plots on the right show relative fluorescence intensity index (means and SEMs,  $n = 3$ ) of the fluorescence histograms.

(F) Flow cytometric analysis of semi-mature and mature thymocytes from B6- $\beta 5t$ Het and B6- $\beta 5t$ KO mice. Plots show cell numbers (means and SEMs,  $n = 4$ ) of MHC class I<sup>low</sup> CD69<sup>high</sup> TCR $\beta$ <sup>high</sup> CCR7<sup>high</sup> (semi-mature, SM), MHC class I<sup>high</sup> CD69<sup>high</sup> TCR $\beta$ <sup>high</sup> CCR7<sup>high</sup> (mature 1, M1), and MHC class I<sup>high</sup> CD69<sup>low</sup> TCR $\beta$ <sup>high</sup> CCR7<sup>high</sup> (mature 2, M2) subpopulations within CD4<sup>+</sup>CD8<sup>-</sup> thymocytes (left; 4SM, 4M1, and 4M2) and CD4<sup>+</sup>CD8<sup>+</sup> thymocytes (right; 8SM, 8M1, and 8M2).

\* $p < 0.05$ ; \*\*\* $p < 0.001$ ; n.s., not significant; n.d., not detected.

clear reduction in the abundance of  $\beta 5t$  protein was detected in  $\beta 5t$ -deficient cTECs (Figure 6A), in which  $\beta 5t$  protein was completely absent (Murata et al., 2007; Ripen et al., 2011). The modest difference in the amount of  $\beta 5t$  protein was most likely due to the well-known underestimation of the quantitative difference in the TMT-labeling strategy for proteomic analysis (Ting et al., 2011, described in detail in the STAR Methods). Nonetheless, our results revealed that among the quantified 5,753 proteins,  $\beta 5t$  was the protein that had by far the largest difference in amount between  $\beta 5t^{-/-}$  and  $\beta 5t^{+/+}$  cTECs (Figure 6A).

The ontology analysis for TMT-identified proteins that were differently ( $Q < 0.4$ ) quantified between  $\beta 5t$ -deficient and control cTECs revealed a highly specific alteration in proteasome components in  $\beta 5t$ -deficient cTECs (Figure 6B). Among the 20S core particle components of the proteasomes, all seven  $\alpha$ -ring components ( $\alpha 1$ – $\alpha 7$ ), all four non-catalytic  $\beta$ -ring components ( $\beta 3$ ,  $\beta 4$ ,  $\beta 6$ , and  $\beta 7$ ), and all three thymoproteasome catalytic

components ( $\beta 1i$ ,  $\beta 2i$ , and  $\beta 5t$ ) were reduced in  $\beta 5t$ -deficient cTECs (Figure 6C). In contrast,  $\beta 5t$ -deficient cTECs showed a modest elevation of  $\beta 5i$  and  $\beta 5$  expression (Figure 6C), which likely reflected the compensation for the loss of  $\beta 5t$  to form the proteasome complexes, as previously reported (Murata et al., 2007, 2018; Nitta et al., 2010). All ATPase components (Rpt1–6) and non-ATPase components (Rpn1–13) of 19S regulatory particle components were also reduced in  $\beta 5t$ -deficient cTECs (Figure 6D). It was also noted that unlike all other components of core and regulatory proteasomal particles,  $\beta 2$  showed no significant ( $Q > 0.9$ ) differences in amount between  $\beta 5t^{-/-}$  and  $\beta 5t^{+/+}$  cTECs (Figure 6C).

Label-free quantitative proteomic analysis (Figure 6E; Table S5) verified that in addition to the loss of  $\beta 5t$  proteins, the majority of proteasome components were reduced in  $\beta 5t$ -deficient cTECs. LC-MS/MS-based label-free quantification utilized the missing value imputation, which enabled the

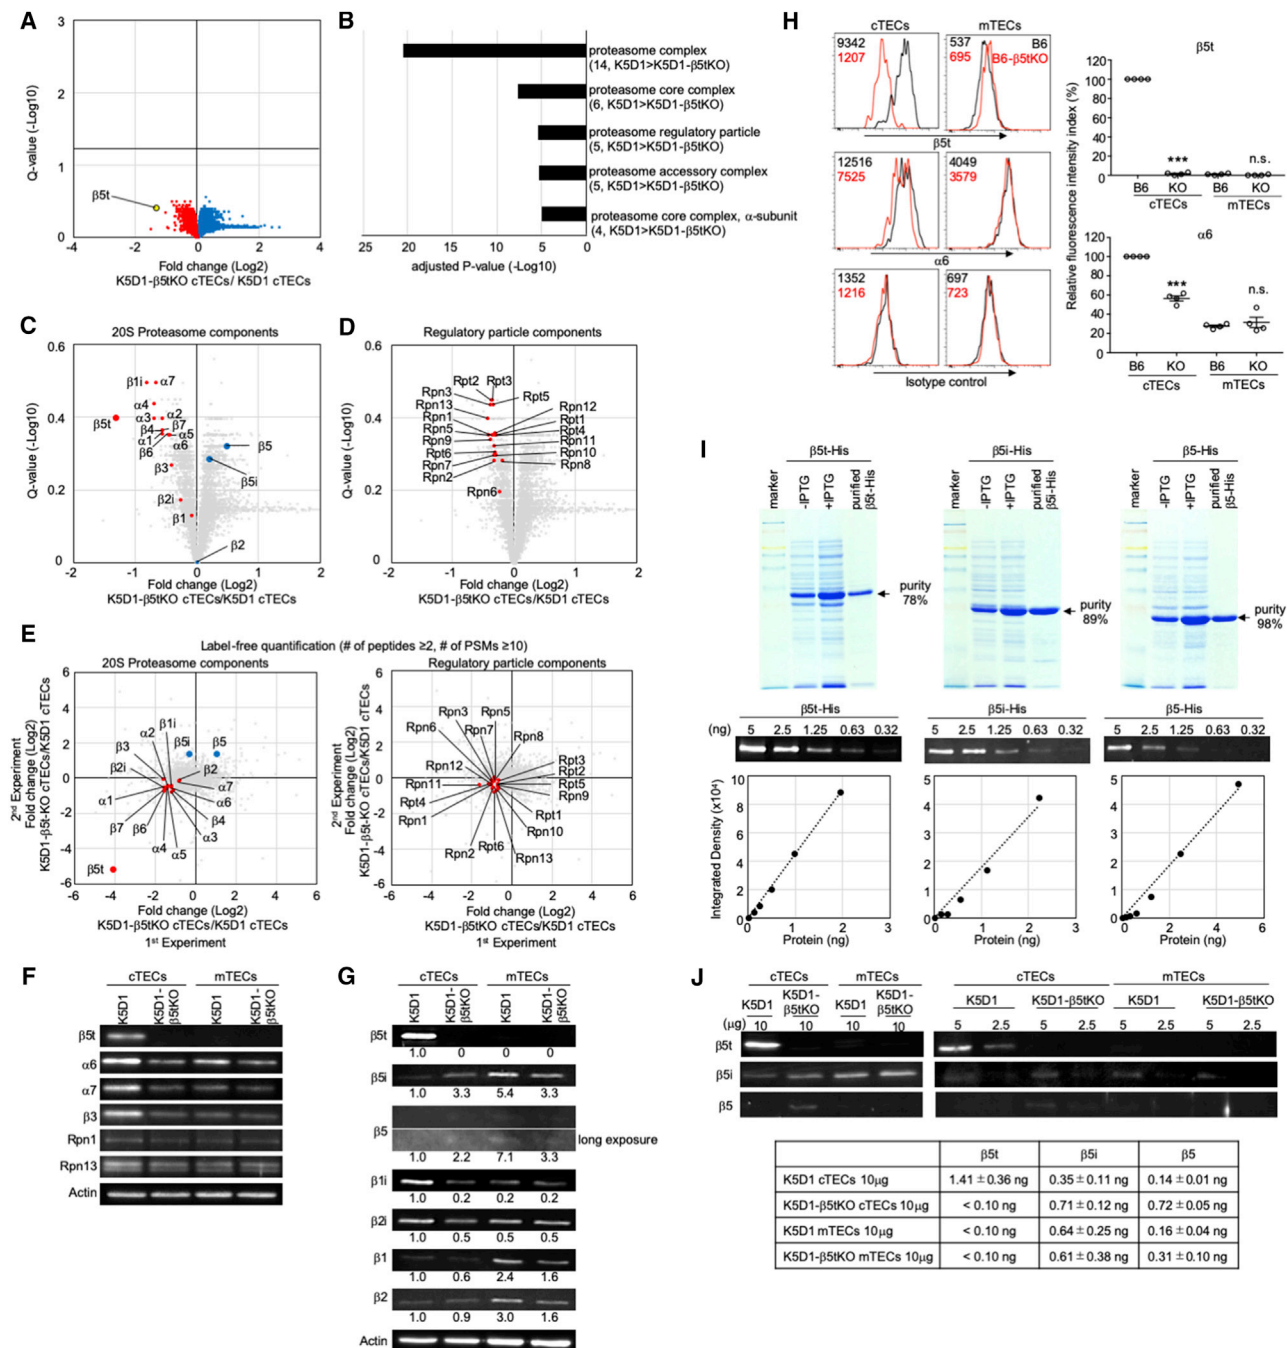

**Figure 6. Alteration in Proteasome Components in cTECs in β5t-Deficient Mice**

(A) Volcano plot analysis of proteomes for K5D1-β5tKO cTECs and K5D1 cTECs. Detected proteins are plotted as log<sub>2</sub> fold changes (K5D1-β5tKO cTECs/K5D1 cTECs) versus -log<sub>10</sub> Q values. Black horizontal line in the plot shows the Q value of 0.05.

(B) Enrichment analysis of the ontology for proteins differently (Q < 0.4) expressed between K5D1 cTECs and K5D1-β5tKO cTECs. Bars show the adjusted p values of top 5 categories. Numbers in parentheses indicate the number of categorized proteins.

(C and D) Volcano plots for 20S proteasome components (C) and regulatory particle proteasome components (D). Plotted are log<sub>2</sub> fold changes (K5D1-β5tKO cTECs/K5D1 cTECs) versus -log<sub>10</sub> Q values for individual components.

(E) Label-free proteomic analysis of protein abundance of cTECs isolated from K5D1 and K5D1-β5tKO mice. Plotted are log<sub>2</sub> fold changes (K5D1-β5tKO cTECs/K5D1 cTECs) of 20S proteasome components (left) and regulatory particle proteasome components (right) in two independent measurements.

(F) Immunoblot analysis of β5t, α6, α7, β3, Rpn1, and Rpn13 proteins in cTECs and mTECs isolated from K5D1 mice and K5D1-β5tKO mice. β-actin was examined as loading control.

(legend continued on next page)

fold-change comparison of small amounts of proteins among multiple samples (Berg et al., 2019). We noticed that 10 out of 11  $\beta$ 5t-derived peptide signals were completely absent prior to the imputation in the label-free MS analysis of  $\beta$ 5t-knockout cTEC samples (Table S6), reconfirming the absolute absence of actual  $\beta$ 5t protein in  $\beta$ 5t-deficient cTECs and suggesting that the only positively detected peptide signal actually represented a coincidentally detected false-positive signal unrelated to  $\beta$ 5t.

In agreement with the MS measurements, immunoblot analysis demonstrated the loss in  $\beta$ 5t subunit and the reduction in non-catalytic proteasome components ( $\alpha$ 6,  $\alpha$ 7,  $\beta$ 3, Rpn1, and Rpn13) in cTECs from  $\beta$ 5t-deficient mice (Figure 6F). Additional immunoblot analysis of the catalytic proteasome components reconfirmed the reduction in  $\beta$ 1,  $\beta$ 1i, and  $\beta$ 2i; no apparent alteration in  $\beta$ 2; and the increase in  $\beta$ 5 and  $\beta$ 5i in  $\beta$ 5t-deficient cTECs (Figure 6G). Flow cytometric analysis further showed the complete absence of  $\beta$ 5t and the approximately 40% reduction of  $\alpha$ 6 in cTECs from  $\beta$ 5t-deficient mice in B6 background (Figure 6H).

To further verify the alteration in the amounts of  $\beta$ 5 and  $\beta$ 5i in cTECs from  $\beta$ 5t-deficient mice, we synthesized  $\beta$ 5,  $\beta$ 5i, and  $\beta$ 5t proteins in bacteria and determined their sensitivities for the absolute quantification of these proteins in immunoblot analysis (Figure 6I). Measurements of the absolute amounts of  $\beta$ 5,  $\beta$ 5i, and  $\beta$ 5t proteins in equivalent amounts of TEC lysates isolated from K5D1 mice revealed that unlike  $\beta$ 5t<sup>+/+</sup> cTECs, which predominantly expressed the  $\beta$ 5t subunit, the loss of  $\beta$ 5t in  $\beta$ 5t<sup>-/-</sup> cTECs was accompanied by the abundant expression of both  $\beta$ 5 and  $\beta$ 5i proteins (Figure 6J). In addition to the 2-fold increase in the absolute amount of  $\beta$ 5i in  $\beta$ 5t-deficient cTECs, the amount of  $\beta$ 5 protein increased markedly, at approximately 5-fold in  $\beta$ 5t<sup>-/-</sup> cTECs (Figure 6J). The predominant detection of  $\beta$ 5i rather than  $\beta$ 5 in  $\beta$ 5t-deficient cTECs in a previous study (Nitta et al., 2010; also shown in Figure 6G) was likely due to the lower sensitivity of  $\beta$ 5 than  $\beta$ 5i by the antibody-mediated detection in the immunoblot analysis (Figure 6I).

These results indicate that the quantitative proteomic profiles of cTECs are highly similar between  $\beta$ 5t<sup>-/-</sup> and  $\beta$ 5t<sup>+/+</sup> mice. However, the majority of proteasome components, including the 20S core particle components and the 19S regulatory particle components, are modestly but specifically reduced in the amount in cTECs as a consequence of a genetic loss of  $\beta$ 5t. On the contrary,  $\beta$ 5i and  $\beta$ 5 are elevated in amount to potentially compensate the loss of  $\beta$ 5t to maintain proteasome complexes in  $\beta$ 5t-deficient cTECs.

### No Constitutive Stress Response in cTECs in $\beta$ 5t-Deficient Mice

Our results indicate that  $\beta$ 5t-deficient cTECs have modestly reduced amounts of most proteasome components. It was demonstrated that a deficiency in proteasomes would ignite a stress response in cells (Bush et al., 1997; Mathew et al., 1998). We finally examined whether the modest reduction in the amounts of many proteasome components detected in  $\beta$ 5t-deficient cTECs would impair proteasome activity and subsequently trigger stress responses in cTECs. We found that the proteasome activity detected by a cell-permeable triple-leucine substrate-based fluorescent probe (Figure S7A) was not significantly altered in  $\beta$ 5t-deficient cTECs, indicating that control and  $\beta$ 5t-deficient cTECs were comparable in the chymotrypsin-like proteolytic activity of the proteasomes (Figure 7A). The absence of alteration in proteasome activity despite the reduction in the amount might be due in part to the compensatory incorporation of  $\beta$ 5i into the proteasomes in  $\beta$ 5t-deficient cTECs (Figure 6), which could lead to the expression of  $\beta$ 5i-containing immunoproteasomes having higher chymotrypsin-like activity than  $\beta$ 5t-containing thymoproteasomes (Murata et al., 2007; Sasaki et al., 2015).

In agreement with the lack of reduction in proteasome activity, we detected no accumulation of ubiquitinated proteins in  $\beta$ 5t-deficient cTECs (Figures 7B and S7B), suggesting that ubiquitinated proteins were degraded in  $\beta$ 5t-deficient cTECs. Accordingly, we detected no elevation of *Sqstm1* mRNAs encoding the stress-responsive signaling adaptor protein p62 (Sánchez-Martín et al., 2019) in  $\beta$ 5t-deficient cTECs isolated from B6 background mice (Figure 7C). We also detected no elevation of *Nrf1* mRNAs in  $\beta$ 5t-deficient cTECs (Figure 7D), a gene encoding a transcription factor that plays an essential role in the restoration of proteasome subunit genes during proteasome impairment (Koizumi et al., 2018). In addition, ontology analysis of proteomic profiles confirmed no manifestation of endoplasmic reticulum stress response in  $\beta$ 5t-deficient cTECs (Figure 7E).

It is well appreciated that autophagy is constitutively active in cTECs even without nutritional deprivation and contributes to the optimization of self-antigen processing for inducing T-cell selection (Nedjic et al., 2008). It was therefore interesting to examine whether the loss of  $\beta$ 5t would trigger signals to augment the constitutive autophagy in cTECs. However, we detected the comparable formation of LC3-containing autophagosomes in cTECs between B6- $\beta$ 5t-deficient mice and control B6 mice (Figure 7F). Proteins associated with the ontology of autophagy were

(G) Immunoblot analysis of  $\beta$ 5t,  $\beta$ 5i,  $\beta$ 5,  $\beta$ 2i,  $\beta$ 1i,  $\beta$ 2, and  $\beta$ 1 proteins in cTECs and mTECs isolated from K5D1 mice and K5D1- $\beta$ 5tKO mice.  $\beta$ -actin was examined as loading control. Numbers show relative amounts of the signals normalized with those of actin.

(H) Histograms show the flow cytometric detection of  $\beta$ 5t (top) and  $\alpha$ 6 (middle) along with the background signals detected by isotype control reagents (bottom) in cTECs and mTECs from B6 mice (black line) and B6- $\beta$ 5tKO mice (red line). Numbers in histograms show the mean fluorescence intensity (MFI). Plots on the right show the relative fluorescence intensity indexes (RFI; means and SEMs,  $n = 4$ ) of  $\beta$ 5t (top) and  $\alpha$ 6 (bottom) expression. \*\*\* $p < 0.001$ ; n.s. not significant (comparison between B6 and KO groups).

(I) Coomassie Brilliant Blue stained SDS-PAGE gels showing the production and purification of  $\beta$ 5t-His,  $\beta$ 5i-His, and  $\beta$ 5-His proteins (top). The absolute amounts of purified proteins were determined by a fluorometer and normalized to protein purity. Immunoblot analysis of indicated amounts of  $\beta$ 5t-His,  $\beta$ 5i-His, and  $\beta$ 5-His proteins (middle). Standard curves between the amounts of purified  $\beta$ 5t-His,  $\beta$ 5i-His, and  $\beta$ 5-His proteins on the x axis and the integrated density of the immunoblot signals on the y axis (bottom).

(J) Immunoblot analysis of  $\beta$ 5t,  $\beta$ 5i, and  $\beta$ 5 proteins in indicated amounts ( $\mu$ g) of the lysates of cTECs and mTECs isolated from K5D1 mice and K5D1- $\beta$ 5tKO mice. The amounts of indicated proteins ( $n = 3$ ) were deduced according to the standard curves shown in (I).



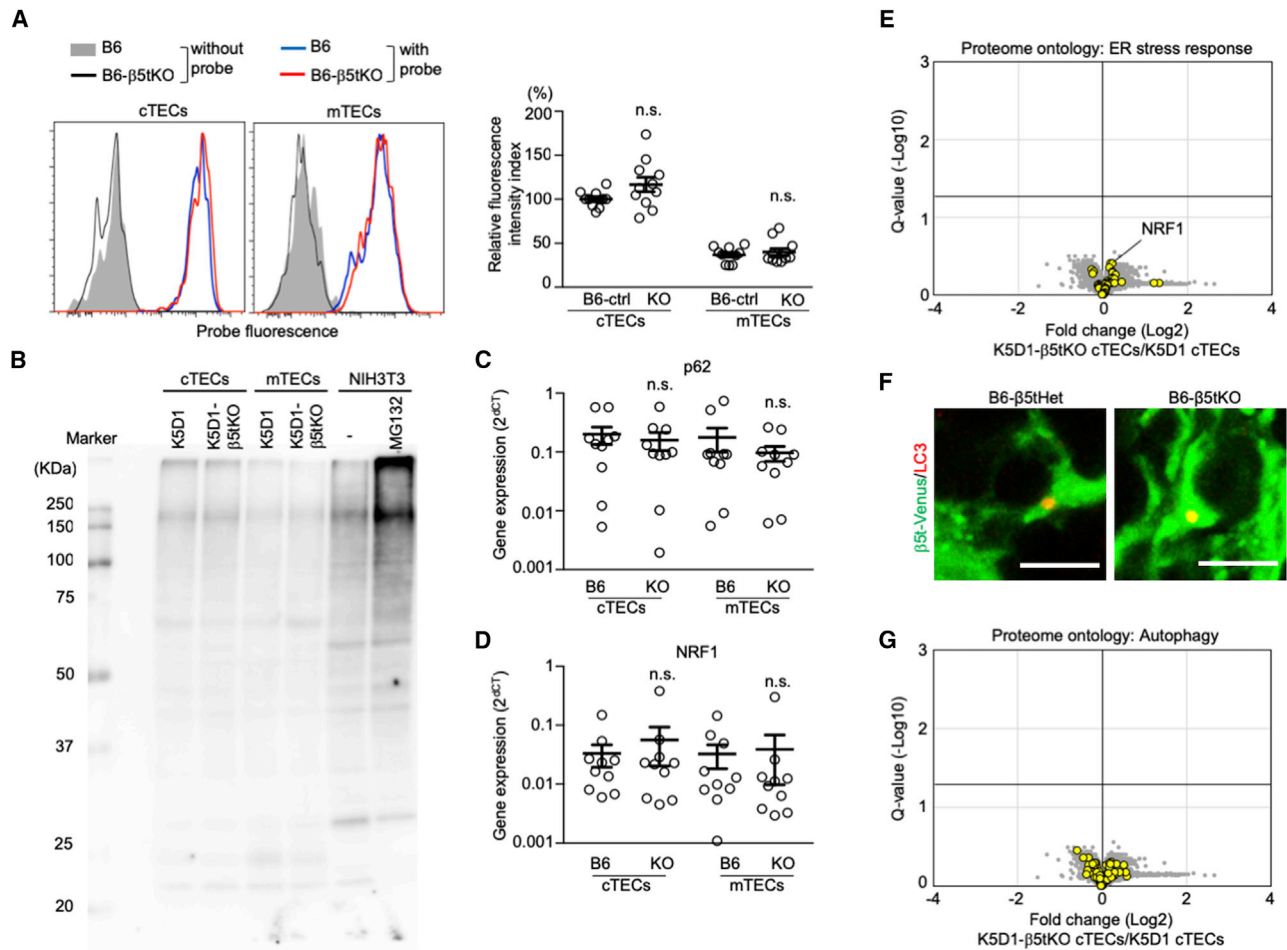

**Figure 7. No Constitutive Stress Response in cTECs in β5t-Deficient Mice**

(A) Proteasome activity in β5t-deficient and control cTECs. Histograms show the detection of proteasome activity by cell-permeable triple-leucine substrate-based fluorescent probe in cTECs and mTECs of B6 mice (blue line) and B6-β5tKO mice (red line). Shaded area and black line represent background fluorescence profiles without the addition of proteasome probe in B6 cTECs and B6-β5tKO cTECs, respectively. Plots on the right show relative fluorescence intensity index (means and SEMs, n = 10–11). B6-ctrl indicates B6 and B6-β5tHet mice. n.s., not significant.

(B) Immunoblot analysis of ubiquitin in cTECs and mTECs isolated from K5D1 and K5D1-β5tKO mice. NIH 3T3 cells with or without proteasome inhibitor MG132 treatment were also examined.

(C and D) qPCR analysis of mRNA expression levels (means and SEMs, n = 10) of p62/*Sqstm1* (C) and *Nrf1* (D) relative to *Gapdh* in cTECs and mTECs isolated from B6 and B6-β5tKO mice. n.s., not significant.

(E) Volcano plot analysis of TMT-based quantitative proteomes for K5D1-β5tKO cTECs and K5D1 cTECs, highlighting proteins with the ontology of ER stress response (yellow symbols). Detected proteins are plotted as log<sub>2</sub> fold changes (K5D1-β5tKO cTECs/K5D1 cTECs) versus –log<sub>10</sub> Q values. Black horizontal line in the plot shows the Q value of 0.05.

(F) Immunofluorescence analysis of LC3 (red) and β5t-venus (green) in the thymic sections of B6-β5tHet (β5t<sup>Venus/+</sup>) and B6-β5tKO (β5t<sup>Venus/Venus</sup>) mice. Representative data from two independent experiments are shown. Scale bars, 5 μm.

(G) Volcano plot analysis of TMT-based quantitative proteomes for K5D1-β5tKO cTECs and K5D1 cTECs, highlighting proteins with the ontology of autophagy (yellow symbols). Detected proteins are plotted as log<sub>2</sub> fold changes (K5D1-β5tKO cTECs/K5D1 cTECs) versus –log<sub>10</sub> Q values. Black horizontal line in the plot shows the Q value of 0.05.

neither significantly nor coordinately altered in β5t-deficient cTECs (Figure 7G).

In agreement with previous results showing the comparable expression of surface MHC-I molecules in cTECs from β5t-deficient mice of B6 background (Nitta et al., 2010) and the comparable decay in surface MHC-I molecules in embryonic fibroblasts that expressed β5t or β5i (Sasaki et al., 2015), we found that

MHC-I expression and its decay in the presence of brefeldin A, representing the stability of MHC-I expression, were comparable between K5D1 cTECs and B6 cTECs in the absence or presence of β5t (Figure S7C).

These results indicate that despite the modest reduction in the amounts of many proteasome components, β5t-deficient cTECs are neither reduced in proteasomal chymotrypsin-like activity

nor accumulated with ubiquitinated proteins. Consequently, the genetic loss of  $\beta 5t$  neither triggers stress signals nor alters autophagy in cTECs.

## DISCUSSION

The present results demonstrate that the enlarged thymuses in K5D1 mice are functionally potent in the production and selection of immunocompetent and self-tolerant T cells and so provide a useful source for the preparation of thymic cells, including TEC subpopulations for biochemical analysis including proteomic analysis, which requires a relatively large number of cells. In contrast to normal mice, from which fewer than  $5 \times 10^3$  cTECs and approximately  $10^4$  mTECs can be isolated per mouse (Gray et al., 2006; Sakata et al., 2018), K5D1 mice readily enable the isolation of more than  $10^5$  cTECs and more than  $10^5$  mTECs from one mouse, which would enable practical sample preparation for mass-spectrometry-based quantitative proteomic analysis of cTECs and mTECs. The results described in this study reveal previously unknown quantitative profiles of unbiased proteomes in freshly isolated cTECs and mTECs. In combination with transcriptomic analysis, our trans-omics analysis identifies signature molecules that functionally and developmentally characterize a sharp contrast between cTECs and mTECs.

The thymuses in K5D1 mice maintain the corticomedullary structure and the T-cell-producing capability (Robles et al., 1996; Klug et al., 2000; Bolner, 2015). Our results show that the flow cytometric profiles of cTECs and mTECs, as well as the CD4/CD8 and TCR $\beta$ /TCR $\delta$  profiles of thymocytes, are similar between K5D1 thymuses and B6 thymuses. Accordingly, similar to B6 thymuses, the cortical regions in the enlarged K5D1 thymuses are enriched with  $\beta 5t^+$  cTECs and CD4/CD8 double-positive thymocytes, and the K5D1 thymic medullas contain Aire $^+$  mTECs and CD4/CD8 single-positive thymocytes. Our results further show that  $\beta 5t^+$  cTECs in K5D1 mice are functionally potent to optimize the CD8 $^+$  T-cell production, and Aire $^+$  mTECs in K5D1 mice are essential for the establishment of self-tolerance in T cells. Indeed, peripheral T cells generated in K5D1 mice are functionally competent and self-tolerant. Thus, the hyperplastic thymic microenvironments, including cTECs and mTECs, in K5D1 mice are functionally capable of producing and selecting immunocompetent and self-tolerant T cells. Moreover, in comparison with previous data (Sakata et al., 2018), our results show that cTECs and mTECs can be isolated with an equivalent efficiency between K5D1 and B6 thymuses. Thus, the thymuses in K5D1 mice are a useful source of cTECs and mTECs for biochemical analysis, including proteomic analysis that requires relatively large-scale cell preparation.

Consequently, our trans-omics data (i.e., the combination of transcriptomic and proteomic data) from cTECs and mTECs offer a useful resource for further explorations of the biology of TECs and their subpopulations. The list of the molecules whose expression levels are significantly different between cTECs and mTECs coordinately in both transcriptomic and proteomic analyses can be particularly useful. For example, it was previously shown that the unique protein degradation machinery by cathepsin L, TSSP, and  $\beta 5t$  in cTECs is important for inducing positive selection of functionally competent T cells (Murata

et al., 2007; Nakagawa et al., 1998; Gommeaux et al., 2009; Kondo et al., 2019). Our trans-omics analysis identifies that in addition to cathepsin L, TSSP, and  $\beta 5t$ , cathepsin D and calpain 1 are more abundant in cTECs than in mTECs. On the contrary, cathepsin C, cathepsin H, and cathepsin Z are expressed more abundantly in mTECs than cTECs, in addition to the previously described cathepsin S. These proteases, which are distinctively expressed in either cTECs or mTECs, may additionally play an important role in self-antigen processing for the TCR repertoire formation in T cells.

It is important to point out that cTECs isolated from either K5D1 or B6 mice contain multicellular TNC complexes that enclose CD4 $^+$ CD8 $^+$  thymocytes. In comparison with cTECs, mTECs can be far more easily separated from thymocytes, so that both transcriptomic and proteomic profiles of mTECs are essentially free from signals derived from co-purified thymocytes. On the contrary, we have estimated that 20% to 27% of RNAs and 3% to 5% of proteins extracted from isolated cTECs originate from TNC-enclosed CD4 $^+$ CD8 $^+$  thymocytes. Consequently, the transcriptomic profiles of cTECs are considerably affected by the co-purified CD4 $^+$ CD8 $^+$  thymocytes, in agreement with the transcriptomic data of cTECs reported by other groups (Sansom et al., 2014; Immunological Genome Project, <http://www.immgen.org>). In contrast, the proteomic profiles of cTECs are only marginally affected by the proteins extracted from TNC-enclosed CD4 $^+$ CD8 $^+$  thymocytes, so that our proteomic and trans-omics profiles of cTECs are largely free from signals derived from CD4 $^+$ CD8 $^+$  thymocytes.

Our unbiased and quantitative proteomic profiles reveal a high similarity between cTECs isolated from  $\beta 5t$ -deficient mice and those from control mice. Strikingly, however, our data also reveal that the majority of proteasome components, including the 20S core particle components and the 19S regulatory particle components, are modestly but specifically reduced in  $\beta 5t$ -deficient cTECs. On the contrary,  $\beta 5i$  and  $\beta 5$  are elevated in amount, potentially to compensate the loss of  $\beta 5t$  and maintain proteasome complexes in  $\beta 5t$ -deficient cTECs, as demonstrated previously (Murata et al., 2007; Nitta et al., 2010). Our RNA sequencing data show that the majority of proteasome components were not significantly altered in mRNA amount in  $\beta 5t$ -deficient cTECs. The molecular mechanism for the coordinated reduction in the majority of proteasome components in  $\beta 5t$ -deficient cTECs is unknown. It is known, however, that the  $\beta 5$  subunit acts as an intramolecular chaperone to support proteasome assembly (Chen and Hochstrasser, 1996; Hirano et al., 2008) and that  $\beta 5i$  is incorporated preferentially over  $\beta 5$  into the proteasome intermediates containing  $\beta 1i$  and  $\beta 2i$  subunits (Griffin et al., 1998; Tanaka, 2009). It is possible that  $\beta 5t$  is more efficient than  $\beta 5i$  or  $\beta 5$  in assembling with other components to form thymoproteasomes, so that the loss of  $\beta 5t$  gene expression may cause an inefficient proteasome assembly and thereby reduce the number of proteasomes in  $\beta 5t$ -deficient cTECs.

Interestingly, our data further show that proteasome activity detected by a cell-permeable triple-leucine substrate-based fluorescent probe is not significantly altered in  $\beta 5t$ -deficient cTECs, indicating that control and  $\beta 5t$ -knockout cTECs are comparable in the chymotrypsin-like proteolytic activity of the proteasomes. We think that the proteasomes in  $\beta 5t$ -knockout

cTECs are altered in substrate preference and produce altered MHC-I-associated peptidome, as previously suggested by the experiments using embryonic fibroblasts (Sasaki et al., 2015). We speculate that the absence of alteration in triple-leucine substrate-based chymotrypsin-like activity in  $\beta 5t$ -deficient cTECs may be due in part to the compensatory incorporation of  $\beta 5i$  into proteasome complexes in  $\beta 5t$ -deficient cTECs, which results in the expression of  $\beta 5i$ -containing proteasomes having higher chymotrypsin-like activity than the  $\beta 5t$ -containing proteasomes (Murata et al., 2007; Sasaki et al., 2015). Smaller amounts of proteasomes with higher chymotrypsin-like activity may result in no significant alteration of chymotrypsin-like activity in  $\beta 5t$ -deficient cTECs. We are amenable to the previous suggestion that proteasomes in  $\beta 5t$ -deficient cTECs are altered in substrate preference and produce altered MHC-I-associated peptidome. Indeed, a recent study showed that human thymoproteasomes and immunoproteasomes differ in cleavage preference quantitatively and qualitatively (Kuckelkorn et al., 2019).

We further show that despite the reduction in many proteasome components,  $\beta 5t$ -deficient cTECs do not constitutively ignite stress responses. It was previously demonstrated that  $\beta 5t$ -deficient cTECs are unable to optimize the production of functionally potent CD8<sup>+</sup> T cells (Murata et al., 2018; Nitta et al., 2010; Takada et al., 2015). The present results showing the specific alteration in proteasome components in  $\beta 5t$ -deficient cTECs without noticeable alteration in other proteins support the possibility that  $\beta 5t$  in cTECs uniquely affects proteasome-mediated processing of self-antigen peptides, which are associated with MHC class I complexes to induce the positive selection of CD8<sup>+</sup> T cells (Murata et al., 2007; Nitta et al., 2010; Sasaki et al., 2015; Tomaru et al., 2019), rather than pervasively affecting other biological processes in cTECs for the regulation of CD8<sup>+</sup> T-cell production. It is important in the future to characterize MHC class-I-associated peptides displayed by cTECs in the presence or absence of  $\beta 5t$ .

Our quantitative proteomic profiles also show that the majority of proteasome components, including the 20S core particle components and the 19S regulatory particle components, are significantly more abundant in cTECs than in mTECs. Indeed, higher proteasome activity is detected in cTECs than in mTECs. However, neither the accumulation of ubiquitinated proteins nor the elevation of *p62* and *Nrf1* mRNAs is detectable even in mTECs, suggesting that the proteasome activity detected in mTECs is sufficient for mTECs to maintain cellular homeostasis. As cTECs are larger in size (Nakagawa et al., 2012) and more abundant in proteins (this study) than mTECs, cTECs may require higher proteasome activity than mTECs to maintain cellular survival and functions.

Finally, our results show that the hyperplastic thymuses in K5D1 mice are functionally capable of producing and selecting immunocompetent and self-tolerant T cells. Our results also show that in comparison with the thymuses in normal B6 mice, the thymuses in K5D1 mice are massively enlarged with an approximately 80- to 100-fold larger number of TECs. Accordingly, the cellularity of thymocytes in K5D1 mice increases to approximately 30- to 50-fold the cellularity in B6 mice. We further note that T cells in the spleens of K5D1 mice are elevated in the cellularity with a 2- to 3-fold increase. It is clear that the numbers

of both thymocytes and peripheral T cells are elevated proportionally with the increase in TEC cellularity, in agreement with a previous study of the engraftment of a graded number of thymic lobes (Berzins et al., 1999). However, the disparity between massive thymus enlargement and modest T-cell increase in the periphery suggests the presence of a homeostatic mechanism that limits peripheral T-cell numbers. These implications may be important to work seeking to improve the recovery of T cells in various clinical settings through the reconstitution of TECs (van den Brink et al., 2004; Chaudhry et al., 2016). It is possible that the export of mature thymocytes to the circulation is limited in the enlarged thymus in K5D1 mice, as suggested previously (Bolner, 2015).

In conclusion, the present study using K5D1 mice allows mass-spectrometry-based quantitative proteomic analysis of cTECs and mTECs. Our results reveal a highly specific impact of the thymoproteasome on proteasome subunit composition in cTECs. The reproducible reduction of proteasome components not only in  $\beta 5t$ -deficient K5D1 cTECs, but also in  $\beta 5t$ -deficient B6 cTECs, as well as the high similarity in transcriptomic profiles between K5D1 TECs and B6 TECs, verifies the usefulness of our proteomic profiles obtained from K5D1 TECs in studies of the biology of TECs. Although it is important in the future to reveal proteomic profiles of TECs in normal mice, the present results offer an integrated trans-omics platform for further explorations of the biology of TECs and thymic microenvironments.

## STAR★METHODS

Detailed methods are provided in the online version of this paper and include the following:

- KEY RESOURCES TABLE
- LEAD CONTACT AND MATERIALS AVAILABILITY
- EXPERIMENTAL MODEL AND SUBJECT DETAILS
  - Mice
  - Cells
- METHOD DETAILS
  - Thymus section analysis
  - Flow cytometric analysis
  - Single-cell analysis and isolation of TECs
  - Immunofluorescence analysis of isolated TECs
  - Allogeneic T cell response
  - Fluorometric measurement of RNA and proteins
  - RNA sequencing analysis
  - TMT proteomic analysis
  - Label-free proteomic analysis
  - Quantitative RT-PCR analysis
  - Purification of His-tag proteins
  - Immunoblotting
  - Gene ontology term analysis
- QUANTIFICATION AND STATISTICAL ANALYSIS
- DATA AND CODE AVAILABILITY

## SUPPLEMENTAL INFORMATION

Supplemental Information can be found online at <https://doi.org/10.1016/j.celrep.2019.10.079>.

## ACKNOWLEDGMENTS

We thank Drs. Dinah Singer, Alfred Singer, Richard Hodes, Avinash Bhandoola, and Jennifer Cowan for reading the manuscript. We also thank Hitomi Kyuma, Mie Sakata, Megumi Kawano, Felix Kalle-Youngoué, Susan Sharrow, and Alison Jacques for technical assistance. This work was supported by grants from MEXT-JSPS (16H02630 and 17K08884), the Takeda Science Foundation, Sumitomo Foundation, and Novartis Foundation for the Promotion of Science (I.O.); and by the Intramural Research Program of the NIH, the National Cancer Institute, and the Center for Cancer Research (Y. Takahama).

## AUTHOR CONTRIBUTIONS

I.O. and Y. Takahama conceived the study; I.O., S.M., K.T., H. Kosako, and Y. Takahama designed the study; I.O., Y. Tanaka, K.K., S.F., H. Kondo, A.C.P., V.H., M.K., Y.M., R.M., J.H., and H. Kosako performed the experiments; T.K. managed the transcriptomic analysis; H. Kosako managed the proteomic analysis; S.U. and H. Kubota managed the trans-omics analysis; and I.O., Y. Tanaka, S.M., H. Kosako, and Y. Takahama wrote the manuscript.

## DECLARATION OF INTERESTS

The authors declare no conflicting interests.

Received: April 15, 2019

Revised: August 27, 2019

Accepted: October 18, 2019

Published: November 26, 2019

## REFERENCES

- Anderson, G., and Takahama, Y. (2012). Thymic epithelial cells: working class heroes for T cell development and repertoire selection. *Trends Immunol.* **33**, 256–263.
- Anderson, G., Jenkinson, E.J., Moore, N.C., and Owen, J.J. (1993). MHC class II-positive epithelium and mesenchyme cells are both required for T-cell development in the thymus. *Nature* **362**, 70–73.
- Anderson, M.S., Venanzi, E.S., Klein, L., Chen, Z., Berzins, S.P., Turley, S.J., von Boehmer, H., Bronson, R., Dierich, A., Benoist, C., and Mathis, D. (2002). Projection of an immunological self shadow within the thymus by the aire protein. *Science* **298**, 1395–1401.
- Apavaloaei, A., Brochu, S., Dong, M., Rouette, A., Hardy, M.P., Villafano, G., Murata, S., Melichar, H.J., and Perreault, C. (2019). PSMB11 orchestrates the development of CD4 and CD8 thymocytes via regulation of gene expression in cortical thymic epithelial cells. *J. Immunol.* **202**, 966–978.
- Benjamini, Y., and Hochberg, Y. (1995). Controlling the false discovery rate: a practical and powerful approach to multiple testing. *J. R. Stat. Soc. B* **57**, 289–300.
- Berg, P., McConnell, E.W., Hicks, L.M., Popescu, S.C., and Popescu, G.V. (2019). Evaluation of linear models and missing value imputation for the analysis of peptide-centric proteomics. *BMC Bioinformatics* **20**, 102.
- Berzins, S.P., Godfrey, D.I., Miller, J.F.A.P., and Boyd, R.L. (1999). A central role for thymic emigrants in peripheral T cell homeostasis. *Proc. Natl. Acad. Sci. USA* **96**, 9787–9791.
- Blackburn, C.C., and Manley, N.R. (2004). Developing a new paradigm for thymus organogenesis. *Nat. Rev. Immunol.* **4**, 278–289.
- Boehm, T. (2008). Thymus development and function. *Curr. Opin. Immunol.* **20**, 178–184.
- Bolner, M.L. (2015). Preventing thymus involution in K5.Cyclin D1 transgenic mice sustains the naïve T cell compartment with age. *UT GSBS Dissertations and Theses* **636**.
- Bornstein, C., Nevo, S., Giladi, A., Kadouri, N., Pouzolles, M., Gerbe, F., David, E., Machado, A., Chuprin, A., Tóth, B., et al. (2018). Single-cell mapping of the thymic stroma identifies IL-25-producing tuft epithelial cells. *Nature* **559**, 622–626.
- Bush, K.T., Goldberg, A.L., and Nigam, S.K. (1997). Proteasome inhibition leads to a heat-shock response, induction of endoplasmic reticulum chaperones, and thermotolerance. *J. Biol. Chem.* **272**, 9086–9092.
- Chaudhry, M.S., Velardi, E., Dudakov, J.A., and van den Brink, M.R. (2016). Thymus: the next (re)generation. *Immunol. Rev.* **271**, 56–71.
- Chen, P., and Hochstrasser, M. (1996). Autocatalytic subunit processing couples active site formation in the 20S proteasome to completion of assembly. *Cell* **86**, 961–972.
- Derbinski, J., and Kyewski, B. (2010). How thymic antigen presenting cells sample the body's self-antigens. *Curr. Opin. Immunol.* **22**, 592–600.
- Derbinski, J., Gäbler, J., Brors, B., Tierling, S., Jonnakuty, S., Hergenhan, M., Peltonen, L., Walter, J., and Kyewski, B. (2005). Promiscuous gene expression in thymic epithelial cells is regulated at multiple levels. *J. Exp. Med.* **202**, 33–45.
- Fehling, H.J., Swat, W., Laplace, C., Kühn, R., Rajewsky, K., Müller, U., and von Boehmer, H. (1994). MHC class I expression in mice lacking the proteasome subunit LMP-7. *Science* **265**, 1234–1237.
- Gommeaux, J., Grégoire, C., Nguessan, P., Richelme, M., Malissen, M., Guerder, S., Malissen, B., and Carrier, A. (2009). Thymus-specific serine protease regulates positive selection of a subset of CD4<sup>+</sup> thymocytes. *Eur. J. Immunol.* **39**, 956–964.
- Gray, D.H., Seach, N., Ueno, T., Milton, M.K., Liston, A., Lew, A.M., Goodnow, C.C., and Boyd, R.L. (2006). Developmental kinetics, turnover, and stimulatory capacity of thymic epithelial cells. *Blood* **108**, 3777–3785.
- Griffin, T.A., Nandi, D., Cruz, M., Fehling, H.J., Kaer, L.V., Monaco, J.J., and Colbert, R.A. (1998). Immunoproteasome assembly: cooperative incorporation of interferon  $\gamma$  (IFN- $\gamma$ )-inducible subunits. *J. Exp. Med.* **187**, 97–104.
- Heng, T.S.P., and Painter, M.W.; Immunological Genome Project Consortium (2008). The Immunological Genome Project: networks of gene expression in immune cells. *Nat. Immunol.* **9**, 1091–1094.
- Hirano, Y., Kaneko, T., Okamoto, K., Bai, M., Yashiroda, H., Furuyama, K., Kato, K., Tanaka, K., and Murata, S. (2008). Dissecting  $\beta$ -ring assembly pathway of the mammalian 20S proteasome. *EMBO J.* **27**, 2204–2213.
- Klein, L., Kyewski, B., Allen, P.M., and Hogquist, K.A. (2014). Positive and negative selection of the T cell repertoire: what thymocytes see (and don't see). *Nat. Rev. Immunol.* **14**, 377–391.
- Klug, D.B., Carter, C., Crouch, E., Roop, D., Conti, C.J., and Richie, E.R. (1998). Interdependence of cortical thymic epithelial cell differentiation and T-lineage commitment. *Proc. Natl. Acad. Sci. USA* **95**, 11822–11827.
- Klug, D.B., Crouch, E., Carter, C., Coghlan, L., Conti, C.J., and Richie, E.R. (2000). Transgenic expression of cyclin D1 in thymic epithelial precursors promotes epithelial and T cell development. *J. Immunol.* **164**, 1881–1888.
- Koizumi, S., Hamazaki, J., and Murata, S. (2018). Transcriptional regulation of the 26S proteasome by Nrf1. *Proc. Jpn. Acad., Ser. B, Phys. Biol. Sci.* **94**, 325–336.
- Kondo, K., Ohigashi, I., and Takahama, Y. (2019). Thymus machinery for T-cell selection. *Int. Immunol.* **31**, 119–125.
- Kuckelkorn, U., Stübler, S., Textoris-Taube, K., Kilian, C., Niewianda, A., Henklein, P., Janek, K., Stumpf, M.P.H., Mishto, M., and Liepe, J. (2019). Proteolytic dynamics of human 20S thymoproteasome. *J. Biol. Chem.* **294**, 7740–7754.
- Kyewski, B.A., and Kaplan, H.S. (1982). Lymphoepithelial interactions in the mouse thymus: phenotypic and kinetic studies on thymic nurse cells. *J. Immunol.* **128**, 2287–2294.
- Mathew, A., Mathur, S.K., and Morimoto, R.I. (1998). Heat shock response and protein degradation: regulation of HSF2 by the ubiquitin-proteasome pathway. *Mol. Cell. Biol.* **18**, 5091–5098.
- Mathis, D., and Benoist, C. (2009). Aire. *Annu. Rev. Immunol.* **27**, 287–312.
- Meredith, M., Zemmour, D., Mathis, D., and Benoist, C. (2015). Aire controls gene expression in the thymic epithelium with ordered stochasticity. *Nat. Immunol.* **16**, 942–949.



- Miller, C.N., Proekt, I., von Moltke, J., Wells, K.L., Rajpurkar, A.R., Wang, H., Rattay, K., Khan, I.S., Metzger, T.C., Pollack, J.L., et al. (2018). Thymic tuft cells promote an IL-4-enriched medulla and shape thymocyte development. *Nature* 559, 627–631.
- Murata, S., Sasaki, K., Kishimoto, T., Niwa, S., Hayashi, H., Takahama, Y., and Tanaka, K. (2007). Regulation of CD8<sup>+</sup> T cell development by thymus-specific proteasomes. *Science* 316, 1349–1353.
- Murata, S., Takahama, Y., Kasahara, M., and Tanaka, K. (2018). The immunoproteasome and thymoproteasome: functions, evolution and human disease. *Nat. Immunol.* 19, 923–931.
- Nakagawa, T., Roth, W., Wong, P., Nelson, A., Farr, A., Deussing, J., Villadangos, J.A., Ploegh, H., Peters, C., and Rudensky, A.Y. (1998). Cathepsin L: critical role in degradation and CD4 T cell selection in the thymus. *Science* 280, 450–453.
- Nakagawa, Y., Ohigashi, I., Nitta, T., Sakata, M., Tanaka, K., Murata, S., Kanagawa, O., and Takahama, Y. (2012). Thymic nurse cells provide microenvironment for secondary T cell receptor  $\alpha$  rearrangement in cortical thymocytes. *Proc. Natl. Acad. Sci. USA* 109, 20572–20577.
- Nedjic, J., Aichinger, M., Emmerich, J., Mizushima, N., and Klein, L. (2008). Autophagy in thymic epithelium shapes the T-cell repertoire and is essential for tolerance. *Nature* 455, 396–400.
- Nitta, T., Murata, S., Sasaki, K., Fujii, H., Ripen, A.M., Ishimaru, N., Koyasu, S., Tanaka, K., and Takahama, Y. (2010). Thymoproteasome shapes immunocompetent repertoire of CD8<sup>+</sup> T cells. *Immunity* 32, 29–40.
- Ohigashi, I., Zuklys, S., Sakata, M., Mayer, C.E., Zhanybekova, S., Murata, S., Tanaka, K., Holländer, G.A., and Takahama, Y. (2013). Aire-expressing thymic medullary epithelial cells originate from  $\beta$ 5t-expressing progenitor cells. *Proc. Natl. Acad. Sci. USA* 110, 9885–9890.
- Ow, S.Y., Salim, M., Noirel, J., Evans, C., Rehman, I., and Wright, P.C. (2009). iTRAQ underestimation in simple and complex mixtures: “the good, the bad and the ugly”. *J. Proteome Res.* 8, 5347–5355.
- Ripen, A.M., Nitta, T., Murata, S., Tanaka, K., and Takahama, Y. (2011). Ontogeny of thymic cortical epithelial cells expressing the thymoproteasome subunit  $\beta$ 5t. *Eur. J. Immunol.* 41, 1278–1287.
- Robles, A.I., Larcher, F., Whalin, R.B., Murillas, R., Richie, E., Gimenez-Conti, I.B., Jorcano, J.L., and Conti, C.J. (1996). Expression of cyclin D1 in epithelial tissues of transgenic mice results in epidermal hyperproliferation and severe thymic hyperplasia. *Proc. Natl. Acad. Sci. USA* 93, 7634–7638.
- Rodewald, H.R. (2008). Thymus organogenesis. *Annu. Rev. Immunol.* 26, 355–388.
- Sakata, M., Ohigashi, I., and Takahama, Y. (2018). Cellularity of thymic epithelial cells in the postnatal mouse. *J. Immunol.* 200, 1382–1388.
- Sánchez-Martín, P., Saito, T., and Komatsu, M. (2019). p62/SQSTM1: ‘Jack of all trades’ in health and cancer. *FEBS J.* 286, 8–23.
- Sansom, S.N., Shikama-Dorn, N., Zhanybekova, S., Nusspaumer, G., Macaulay, I.C., Deadman, M.E., Heger, A., Ponting, C.P., and Holländer, G.A. (2014). Population and single-cell genomics reveal the Aire dependency, relief from Polycomb silencing, and distribution of self-antigen expression in thymic epithelia. *Genome Res.* 24, 1918–1931.
- Sasaki, K., Takada, K., Ohte, Y., Kondo, H., Sorimachi, H., Tanaka, K., Takahama, Y., and Murata, S. (2015). Thymoproteasomes produce unique peptide motifs for positive selection of CD8<sup>(+)</sup> T cells. *Nat. Commun.* 6, 7484.
- Takada, K., Van Laethem, F., Xing, Y., Akane, K., Suzuki, H., Murata, S., Tanaka, K., Jameson, S.C., Singer, A., and Takahama, Y. (2015). TCR affinity for thymoproteasome-dependent positively selecting peptides conditions antigen responsiveness in CD8<sup>(+)</sup> T cells. *Nat. Immunol.* 16, 1069–1076.
- Takahama, Y., Ohigashi, I., Baik, S., and Anderson, G. (2017). Generation of diversity in thymic epithelial cells. *Nat. Rev. Immunol.* 17, 295–305.
- Tanaka, K. (2009). The proteasome: overview of structure and functions. *Proc. Jpn. Acad., Ser. B, Phys. Biol. Sci.* 85, 12–36.
- Ting, L., Rad, R., Gygi, S.P., and Haas, W. (2011). MS3 eliminates ratio distortion in isobaric multiplexed quantitative proteomics. *Nat. Methods* 8, 937–940.
- Tomaru, U., Konno, S., Miyajima, S., Kimoto, R., Onodera, M., Kiuchi, S., Murata, S., Ishizu, A., and Kasahara, M. (2019). Restricted expression of the thymoproteasome is required for thymic selection and peripheral homeostasis of CD8<sup>+</sup> T Cells. *Cell Rep.* 26, 639–651.e2.
- van den Brink, M.R., Alpdogan, O., and Boyd, R.L. (2004). Strategies to enhance T-cell reconstitution in immunocompromised patients. *Nat. Rev. Immunol.* 4, 856–867.
- Wekerle, H., and Ketelsen, U.P. (1980). Thymic nurse cells—la-bearing epithelium involved in T-lymphocyte differentiation? *Nature* 283, 402–404.
- Xing, Y., Jameson, S.C., and Hogquist, K.A. (2013). Thymoproteasome subunit- $\beta$ 5T generates peptide-MHC complexes specialized for positive selection. *Proc. Natl. Acad. Sci. USA* 110, 6979–6984.

## STAR★METHODS

### KEY RESOURCES TABLE

| REAGENT or RESOURCE                                                        | SOURCE                              | IDENTIFIER                        |
|----------------------------------------------------------------------------|-------------------------------------|-----------------------------------|
| Antibodies                                                                 |                                     |                                   |
| FITC anti-mouse CD4 antibody (RM4-5)                                       | Invitrogen                          | Cat# 11-0042-85, RRID:AB_464897   |
| APC anti-mouse CD4 antibody (RM4-5)                                        | Invitrogen                          | Cat# 17-0042-81, RRID:AB_469322   |
| APC-eFluor 780 anti-mouse CD4 antibody (RM4-5)                             | Invitrogen                          | Cat# 47-0042-82, RRID:AB_1272183  |
| Pacific Blue anti-mouse CD8 $\alpha$ antibody (5H10)                       | Invitrogen                          | Cat# MCD0828TR, RRID:AB_2539693   |
| eFluor 660 anti-mouse CD8 $\alpha$ antibody (53-6.7)                       | Invitrogen                          | Cat# 50-0081-82, RRID:AB_10596646 |
| PE anti-mouse CD25 antibody (PC61)                                         | BD PharMingen                       | Cat# 553866, RRID:AB_395101       |
| PE/Cy5 anti-mouse CD45 antibody (30F-11)                                   | BioLegend                           | Cat# 103110, RRID:AB_312975       |
| FITC anti-mouse CD45 antibody (30F-11)                                     | BioLegend                           | Cat# 103107, RRID:AB_312972       |
| PE/Cy7 anti-mouse CD45 Antibody (30F-11)                                   | BioLegend                           | Cat# 103114, RRID:AB_312979       |
| BV421 rat anti-mouse CD45 (30F-11)                                         | BD Horizon                          | Cat# 563890, RRID:AB_2651151      |
| Biotin anti-mouse CD69 antibody (H1.2F3)                                   | BD PharMingen                       | Cat# 553235, RRID:AB_394724       |
| PE anti-mouse TCR $\beta$ antibody (H57)                                   | BioLegend                           | Cat# 109207, RRID:AB_313430       |
| Alexa Fluor 647 anti-mouse TCR $\beta$ antibody (H57)                      | BioLegend                           | Cat# 109218, RRID:AB_493346       |
| FITC anti-mouse TCR $\gamma/\delta$ antibody (GL3)                         | BD PharMingen                       | Cat# 553177, RRID:AB_394688       |
| PE/Cy7 anti-mouse MHC class I (H-2K <sup>b</sup> ) antibody (AF6-88.5.5.3) | Invitrogen                          | Cat# 25-5958-82, RRID:AB_2573505  |
| BV786 anti-mouse MHC class I (H-2K <sup>b</sup> ) antibody (AF6-88.5)      | BD OptiBuild                        | Cat# 742863, RRID:AB_2741105      |
| PE anti-mouse CD197 (CCR7) antibody (4B12)                                 | Invitrogen                          | Cat# 12-1971-83, RRID:AB_657689   |
| PE/Cy7 anti-mouse CD326 (EpCAM) antibody (G8.8)                            | BioLegend                           | Cat# 118216, RRID:AB_1236471      |
| Brilliant Violet 421 anti-mouse CD326 (Ep-CAM) Antibody                    | BioLegend                           | Cat# 118225, RRID:AB_2563983      |
| Alexa Fluor 647 anti-mouse Ly51 antibody (6C3)                             | BioLegend                           | Cat# 108312, RRID:AB_2099613      |
| Biotin Ulex europaeus agglutinin I (UEA I)                                 | Vector Laboratories                 | Cat# B-1065, RRID:AB_2336766      |
| DyLight 594 labeled Ulex Europaeus Agglutinin I (UEA I)                    | Vector Laboratories                 | Cat# DL-1067                      |
| Streptavidin Alexa Fluor 546                                               | Invitrogen                          | Cat# S-11225, RRID:AB_2532130     |
| Streptavidin Alexa Fluor 594                                               | Invitrogen                          | Cat# S-11227                      |
| Streptavidin APC-eFluor 780                                                | Invitrogen                          | Cat# 47-4317-82, RRID:AB_10366688 |
| Mouse anti-Catenin, beta monoclonal antibody (Clone 14)                    | BD Transduction Laboratories        | Cat# 610154, RRID:AB_397555       |
| eFluor 660 anti-mouse Aire antibody (5H12)                                 | Invitrogen                          | Cat# 50-5934-82, RRID:AB_2574257  |
| LC3B (D11) XP Rabbit mAb antibody                                          | Cell Signaling Technology           | Cat# 3868, RRID:AB_2137707        |
| Mouse anti-Ubiquitin monoclonal antibody (P4D1)                            | Cell Signaling Technology           | Cat# 3936, RRID:AB_331292         |
| Rabbit anti- $\alpha$ 6 antibody                                           | Shigeo Murata, University of Tokyo  | N/A                               |
| Rabbit anti- $\alpha$ 7 antibody                                           | Shigeo Murata, University of Tokyo  | N/A                               |
| Rabbit anti- $\beta$ 1 antibody                                            | Shigeo Murata, University of Tokyo  | N/A                               |
| Rabbit anti- $\beta$ 1i antibody                                           | Shigeo Murata, University of Tokyo  | N/A                               |
| Rabbit anti- $\beta$ 2 antibody                                            | Shigeo Murata, University of Tokyo  | N/A                               |
| Rabbit anti- $\beta$ 2i antibody                                           | Shigeo Murata, University of Tokyo  | N/A                               |
| Rabbit anti- $\beta$ 3 antibody                                            | Shigeo Murata, University of Tokyo  | N/A                               |
| Rabbit anti- $\beta$ 5 antibody                                            | Shigeo Murata, University of Tokyo  | N/A                               |
| Rabbit anti- $\beta$ 5i antibody                                           | Shigeo Murata, University of Tokyo  | N/A                               |
| Rabbit anti- $\beta$ 5t antibody                                           | <a href="#">Murata et al., 2007</a> | N/A                               |

(Continued on next page)

| <b>Continued</b>                                                                              |                                       |                                 |
|-----------------------------------------------------------------------------------------------|---------------------------------------|---------------------------------|
| REAGENT or RESOURCE                                                                           | SOURCE                                | IDENTIFIER                      |
| Rabbit anti-mouse $\beta$ 5t polyclonal antibody                                              | MBL International Corporation         | Cat# PD021, RRID:AB_2171885     |
| Rabbit anti-Rpn1 antibody                                                                     | Shigeo Murata, University of Tokyo    | N/A                             |
| Rat anti-Rpn13 antibody                                                                       | Shigeo Murata, University of Tokyo    | N/A                             |
| Rabbit anti-beta-Actin antibody (13E5)                                                        | Cell Signaling Technology             | Cat# 4970, RRID:AB_2223172      |
| Alexa Fluor Plus 488 goat anti-mouse IgG (H+L) highly cross-adsorbed secondary antibody       | Invitrogen                            | Cat# A32723, RRID:AB_2633275    |
| Donkey anti-rabbit IgG (H+L) antibody- Alexa Fluor 488                                        | Invitrogen                            | Cat# A-21206, RRID:AB_2535792   |
| Goat anti-rabbit IgG (H+L) antibody, Alexa Fluor 488 highly cross-adsorbed secondary antibody | Invitrogen                            | Cat# A-11034, RRID:AB_2576217   |
| Sheep anti-mouse IgG ECL antibody, HRP conjugated                                             | GE Healthcare                         | Cat# NA9310-1ml, RRID:AB_772193 |
| Donkey anti-rabbit IgG ECL antibody, HRP conjugated                                           | GE Healthcare                         | Cat# NA9340-1ml, RRID:AB_772191 |
| Goat anti-rat IgG, whole Ab ECL antibody, HRP conjugated                                      | GE Healthcare                         | Cat# NA935, RRID:AB_772207      |
| <b>Chemicals, Peptides, and Recombinant Proteins</b>                                          |                                       |                                 |
| Liberase TM Research Grade                                                                    | Roche                                 | Cat# 5401127001                 |
| DNase I recombinant, RNase-free                                                               | Roche                                 | Cat# 04716728001                |
| CD45 MicroBeads, mouse                                                                        | Miltenyi Biotec                       | Cat# 130-052-301                |
| Me <sub>4</sub> BodipyFL-Ahx <sub>3</sub> Leu <sub>3</sub> VS (Proteasome activity probe)     | BostonBiochem                         | Cat# I-190                      |
| MG132 (Proteasome inhibitor)                                                                  | AdooQ Bioscience                      | Cat# A11043                     |
| MG-132, $\geq$ 95% by HPLC                                                                    | Millipore                             | Cat# 474787                     |
| Brefeldin A                                                                                   | Sigma Aldrich                         | Cat# B5936                      |
| <b>Critical Commercial Assays</b>                                                             |                                       |                                 |
| Cell Trace Violet Cell Proliferation Kit                                                      | Thermo Fisher Scientific              | Cat# C34557                     |
| His Bind Purification Kit                                                                     | Novagen                               | Cat# 70239                      |
| RNeasy Plus Micro Kit                                                                         | QIAGEN                                | Cat# 74034                      |
| SMART-Seq v4 Ultra Low Input RNA Kit for Sequencing                                           | Clontech                              | Cat# 634888                     |
| Nextera XT DNA Library Preparation Kit                                                        | Illumina                              | Cat# FC-131-1024                |
| RapiGest SF Surfactant                                                                        | Waters                                | Cat# 186001861                  |
| Trypsin/Lys-C Mix, Mass Spec Grade                                                            | Promega                               | Cat# V5072                      |
| Pierce Quantitative Colorimetric Peptide Assay                                                | Thermo Fisher Scientific              | Cat# 23275                      |
| TMT10plex Isobaric Label Reagent Set                                                          | Thermo Fisher Scientific              | Cat# 90309                      |
| Pierce High pH Reversed-Phase Peptide Fractionation Kit                                       | Thermo Fisher Scientific              | Cat# 84868                      |
| <b>Deposited Data</b>                                                                         |                                       |                                 |
| RNA sequencing data                                                                           | The DNA Data Bank of Japan            | DRA008167, DRA008878            |
| MS proteomics data                                                                            | jPOST partner repository              | PXD013132, PXD013133            |
| <b>Experimental Models: Cell Lines</b>                                                        |                                       |                                 |
| NIH 3T3                                                                                       | ATCC                                  | Cat# CRL-1658, RRID:CVCL_0594   |
| <b>Experimental Models: Organisms/Strains</b>                                                 |                                       |                                 |
| Mouse: C57BL/6N                                                                               | SLC Japan                             | N/A                             |
| Mouse: C57BL/6J                                                                               | The Jackson Laboratory                | RRID:IMSR_JAX:000664            |
| Mouse: BALB/cJ                                                                                | The Jackson Laboratory                | RRID:IMSR_JAX:000651            |
| Mouse: DBA/2J                                                                                 | The Jackson Laboratory                | RRID:IMSR_JAX:000671            |
| Mouse: Keratin 5 promoter-driven Cyclin D1 Tg                                                 | <a href="#">Robles et al., 1996</a>   | N/A                             |
| Mouse: $\beta$ 5t <sup>-/-</sup> ( $\beta$ 5t <sup>Venus/Venus</sup> )                        | <a href="#">Murata et al., 2007</a>   | N/A                             |
| Mouse: $\beta$ 5t <sup>-/-</sup> ( $\beta$ 5t <sup>Cre/Cre</sup> )                            | <a href="#">Ohigashi et al., 2013</a> | N/A                             |
| Mouse: $\beta$ 5i <sup>-/-</sup>                                                              | <a href="#">Fehling et al., 1994</a>  | N/A                             |

(Continued on next page)

**Continued**

| REAGENT or RESOURCE     | SOURCE                             | IDENTIFIER      |
|-------------------------|------------------------------------|-----------------|
| Recombinant DNA         |                                    |                 |
| pET28a- $\beta$ 5       | Shigeo Murata, University of Tokyo | N/A             |
| pET28a- $\beta$ 5i      | Shigeo Murata, University of Tokyo | N/A             |
| pET28a- $\beta$ 5t      | Shigeo Murata, University of Tokyo | N/A             |
| Software and Algorithms |                                    |                 |
| GraphPad Prism          | GraphPad Software                  | RRID:SCR_002798 |
| FlowJo                  | FlowJo                             | RRID:SCR_008520 |
| ImageJ                  | NIH                                | RRID:SCR_003070 |
| CLC Genomics Workbench  | QIAGEN                             | RRID:SCR_011853 |
| DAVID                   | Leidos Biomedical Research, Inc    | RRID:SCR_001881 |
| Proteome Discoverer     | Thermo Fisher Scientific           | RRID:SCR_014477 |
| Adobe Photoshop         | Adobe                              | RRID:SCR_014199 |

**LEAD CONTACT AND MATERIALS AVAILABILITY**

Further information and requests for reagents may be directed to and will be fulfilled by the Lead Contact, Yousuke Takahama ([yousuke.takahama@nih.gov](mailto:yousuke.takahama@nih.gov)). This study did not generate new unique reagents.

**EXPERIMENTAL MODEL AND SUBJECT DETAILS****Mice**

C57BL/6 (B6) mice were obtained from SLC Japan and The Jackson Laboratory. BALB/c and DBA/2 mice as well as B6- $\beta$ 5i-deficient mice (Fehling et al., 1994) were obtained from The Jackson Laboratory. Keratin 5 promoter-driven cyclin D1-transgenic (K5D1) mice (Robles et al., 1996) and  $\beta$ 5t-deficient mice (Murata et al., 2007; Ohigashi et al., 2013) were described previously and backcrossed to B6 background. For most experiments including proteomic analysis, male and female mice were analyzed at 12 to 20 weeks old in an age-matched and sex-matched manner. Mice were housed on a 12-hour light-dark cycle in climate-controlled, pathogen-free barrier facilities. All mouse experiments were performed with consent from the Animal Experimentation Committee of the University of Tokushima (T28-58) and from the Animal Care and Use Committee of the National Cancer Institute (ASP 18-431 and EIB-076-2).

**Cells**

NIH 3T3 cells (male) were grown in Dulbecco's Modified Eagle Medium (Nacalai Tesque), supplemented with 10% fetal bovine serum (Invitrogen), penicillin (100 I.U./mL) and streptomycin (100  $\mu$ g/mL) (GIBCO) at 37°C and 5% CO<sub>2</sub>. Where needed, NIH 3T3 cells were cultured in the presence of MG132 (100  $\mu$ M) overnight.

**METHOD DETAILS****Thymus section analysis**

Thymus tissues were fixed with 4% (g/vol) paraformaldehyde (PFA) and embedded in OCT optimum cutting temperature compound (Sakura Finetek). Frozen thymuses were sliced into 10- $\mu$ m-thick sections and stained with antibodies specific for  $\beta$ 5t (Murata et al., 2007; MBL), Aire (Invitrogen, clone 5H12), and LC3B (Cell Signaling Technology, clone D11), followed by AlexaFluor-conjugated anti-IgG antibodies (Invitrogen). Sections were also stained for the reactivity with UEA1 (Vector Laboratories). For the staining with antibodies specific for CD4 (Invitrogen, clone RM4-5) and CD8 $\alpha$  (Invitrogen, clone 53-6.7) in addition to the staining for the reactivity with UEA1, thymus tissues were embedded, sliced, and fixed with acetone. Images were visualized and analyzed with a TCS SP8 (Leica) or an ECLIPSE Ti2 (Nikon) confocal laser scanning microscope.

For the measurement of the area of thymic regions, frozen thymuses were sliced into 10- $\mu$ m-thick sections, fixed with neutral buffered formalin, stained with hematoxylin and eosin (Muto Pure Chemicals), and imaged under an Eclipse E1000 microscope (Nikon). The areas of the cortical and medullary regions in the thymic sections were measured by using Photoshop software (Adobe).

**Flow cytometric analysis**

For the analysis of thymocytes and spleen cells, cells were multicolor stained for CD4 (BioLegend, clone RM4-5), CD8 $\alpha$  (Invitrogen, clone 5H10), CD25 (BD PharMingen, clone PC61), CD69 (BD PharMingen, clone H1.2F3), H-2K<sup>b</sup> MHC class I (Invitrogen, clone AF6-88.5.5.3), TCR $\beta$  (BioLegend, clone H57), and TCR $\delta$  (BD PharMingen, clone GL3). Where indicated, thymocytes were stained for



CCR7 (Invitrogen, clone 4B12) at 37°C for 30 min before the staining with other antibodies. Multicolor flow cytometry was performed on FACSVerse, LSR II, LSRFortessa, and LSRFortessa X-20 (BD Biosciences). Flow cytometric data was analyzed using FlowJo.

### Single-cell analysis and isolation of TECs

For single-cell analysis and isolation of TECs, minced thymuses were digested with 0.5 unit/mL Liberase TM (Roche) in the presence of 0.02% DNase I (Roche). Single-cell suspensions were stained for the expression of EpCAM (CD326, BioLegend, clone G8.8), CD45 (BioLegend, clone 30-F11), Ly51 (CD249, BioLegend, clone 6C3), and for the reactivity with UEA-1 (Vector Laboratories). For the intracellular staining of  $\alpha$ 6,  $\beta$ 5t, and  $\beta$ -catenin in TECs, surface-stained cells were fixed with 2% (g/vol) paraformaldehyde, permeabilized with 0.05% saponin, and stained with anti- $\alpha$ 6 antibody (Murata et al., 2007), anti- $\beta$ 5t antibody (Murata et al., 2007), and anti- $\beta$ -catenin antibody (BD Transduction Laboratories, clone 14), followed by AlexaFluor-conjugated anti-IgG antibody (Invitrogen). For the measurement of proteasome activity in TECs, surface-stained cells were incubated with 1  $\mu$ M cell-permeable fluorescent proteasome activity probe (Me<sub>4</sub>BodipyFL-Ahx<sub>3</sub>Leu<sub>3</sub>VS, Boston Biochem) at 37°C for 60 min. Where indicated, cells were incubated at 37°C for 30 min in the presence of 1  $\mu$ M or 10  $\mu$ M MG132 prior to the incubation with the proteasome activity probe.

For the measurement of cell-surface expression and its decay of MHC class I molecule H-2K<sup>b</sup> (detected by clone AF6-88.5, BD Biosciences) on TECs, liberase-digested thymic cells were cultured in the presence of 5  $\mu$ g/ml brefeldin A (Sigma Aldrich) for 2 and 4 hours before multicolor flow cytometric analysis of cell-surface molecules.

For the isolation of TECs, CD45<sup>+</sup> cells were enriched with magnetic-bead-conjugated anti-CD45 antibody (Miltenyi Biotec) before multicolor staining for flow cytometric cell sorting. For the isolation of TECs from enlarged K5D1 thymuses, cells were enriched by Percoll density gradient centrifugation before the magnetic enrichment of CD45<sup>+</sup> cells. Multicolor flow cytometry and cell sorting of TECs were performed on FACSVerse and FACSAria II (BD Biosciences).

### Immunofluorescence analysis of isolated TECs

cTECs and mTECs were fixed with 4% (g/vol) PFA, permeabilized with 0.05% saponin, and stained with anti-CD45 antibody (BioLegend, clone 30-F11). Cells were collected on a slide glass by centrifugation at 1,800 rpm for 10 min by using Cytospin 4 (Thermo Fisher). Fluorescence images were analyzed under a TCS SP8 confocal laser scanning microscope (Leica).

### Allogeneic T cell response

Spleen cells from 13~15-week-old B6 and K5D1 mice were labeled with 5  $\mu$ M Cell Trace Violet (Thermo Fisher) at 37°C for 20 min. Spleen cells from 6- to 7-week-old mice were irradiated at 20 Gy for stimulator cells. Labeled cells ( $2 \times 10^6$ ) were cultured with stimulator cells ( $8 \times 10^6$ ) at 37°C for 6 days. Cell Trace Violet fluorescence in TCR $\beta$ <sup>high</sup> T cells was measured by flow cytometry.

### Fluorometric measurement of RNA and proteins

Total cellular RNA was extracted by using a RNeasy Plus Micro Kit (QIAGEN). For protein extraction, cells were lysed in 150  $\mu$ L of 6 M guanidine-HCl containing 100 mM Tris-HCl, pH 8.0 and 2 mM DTT. The amounts of RNAs and proteins were measured using a Qubit RNA HS Assay Kit and a Qubit Protein Assay Kit, respectively, with a Qubit Fluorometer (Thermo Fisher).

### RNA sequencing analysis

cDNAs were prepared from 3,000 isolated cells by using SMART-Seq v4 Ultra Low Input RNA Kit, according to the manufacturer's protocol (Clontech). Sequencing libraries were generated by using a Nextera XT DNA Library Prep Kit, according to the manufacturer's protocol (Illumina). The concentration of libraries was measured by an ABI PRISM 7500 Real-time PCR system in combination with a Power SYBR Green PCR Master Mix (Thermo Fisher). Single-end sequencing of cDNA libraries with a read length of 50 was performed with HiSeq 1500 platform (Illumina). Data were analyzed by using CLC Genomics Workbench 11 (QIAGEN) with default parameters.

### TMT proteomic analysis

Approximately  $1$  to  $3 \times 10^5$  cells (K5D1 cTECs in quadruplicate, K5D1 mTECs in triplicate, and K5D1- $\beta$ 5tKO cTECs in triplicate) were lysed in 150  $\mu$ L of 6 M guanidine-HCl containing 100 mM Tris-HCl, pH 8.0, and 2 mM DTT. The lysates were dissolved by heating and sonication, followed by centrifugation at 20,000  $\times$  g for 15 min at 4°C. The supernatants were reduced in 5 mM DTT at room temperature for 30 min and alkylated in 27.5 mM iodoacetamide at room temperature for 30 min in the dark. Proteins were purified by methanol/chloroform precipitation and solubilized with 25  $\mu$ L of 0.1% RapiGest SF (Waters) in 50 mM triethylammonium bicarbonate buffer. After repeated sonication and vortexing, the proteins were digested with 0.5  $\mu$ g of trypsin/Lys-C mix (Promega) for 16 hr at 37°C. Peptide concentration was determined using Pierce Quantitative Colorimetric Peptide Assay (Thermo Fisher). Approximately 10  $\mu$ g of peptides for each sample was labeled with 0.2 mg of TMT10-plex reagents (Thermo Fisher) for 1 hr at room temperature. After the reaction was quenched with hydroxylamine, all the TMT-labeled samples were pooled, acidified with trifluoroacetic acid (TFA) and fractionated using a Pierce High pH Reversed-phase Peptide Fractionation Kit (Thermo Fisher). Ten fractions were collected using 5%, 10%, 12.5%, 15%, 17.5%, 20%, 22.5%, 25%, 50%, and 80% acetonitrile (ACN). Each fraction was evaporated in a SpeedVac concentrator and dissolved in 0.1% TFA.

LC-MS/MS analysis of the resultant peptides (1  $\mu\text{g}$  each) was performed on an EASY-nLC 1200 UHPLC connected to a Q Exactive Plus mass spectrometer through a nanoelectrospray ion source (Thermo Fisher). The peptides were separated on a 75  $\mu\text{m}$  inner diameter  $\times$  150 mm C18 reversed-phase column (Nikkyo Technos) with a linear gradient of 4%–20% ACN for 0–180 min and 20%–32% ACN for 180–220 min, followed by an increase to 80% ACN for 220–230 min. The mass spectrometer was operated in the data-dependent acquisition mode with a top 15 MS/MS method. MS1 spectra were measured at a resolution of 70,000, an automatic gain control (AGC) target of  $3 \times 10^6$  and a mass range of 375 to 1,400  $m/z$ . HCD MS/MS spectra were acquired at a resolution of 35,000, an AGC target of  $1 \times 10^5$ , an isolation window of 0.4  $m/z$ , a maximum injection time of 100 msec and a normalized collision energy of 32. Dynamic exclusion was set to 30 s. Raw data were directly analyzed against Swiss-Prot database restricted to *Mus musculus* using Proteome Discoverer version 2.2 (Thermo Fisher) with Mascot search engine version 2.5 (Matrix Science) for identification and TMT quantification. The search parameters were (a) trypsin as an enzyme with up to two missed cleavages, (b) precursor mass tolerance of 10 ppm, (c) fragment mass tolerance of 0.02 Da, (d) TMT of lysine and peptide N terminus and carbamidomethylation of cysteine as fixed modifications, and (e) acetylation of protein N terminus and oxidation of methionine as variable modifications. Peptides and proteins were filtered at the false-discovery rate (FDR) of 1% using the percolator node and the protein FDR validator node, respectively.

Intrinsic to the TMT-MS technology, TMT target ions are frequently accompanied by a small amount of contaminating TMT ions (Ow et al., 2009; Ting et al., 2011; also described in Thermo Fisher technical information). When the amount of reporter signals from target ions is large, the contribution of the contaminating ions is negligible. However, when the amount of reporter signals from target ions is small or even zero, the contaminating ions dominate the signals and thus create bias in the quantification (Ow et al., 2009; Ting et al., 2011). In the case of TMT-MS measurement of  $\beta 5t$ , the reason why a small amount of  $\beta 5t$  was detected in  $\beta 5t$ -deficient cTECs isolated from  $\beta 5t$ -deficient mice is the detection of contaminating ions. Indeed, the abundant detection of  $\beta 5t$  peptide signals in control cTEC samples created a precursor isolation window for all of the simultaneously analyzed samples, including cTEC samples from  $\beta 5t$ -deficient mice. The precursor isolation window for  $\beta 5t$  caused the distorted detection of contaminating ions in  $\beta 5t$ -deficient cTEC samples.

### Label-free proteomic analysis

Proteins were prepared as above (TMT proteomic analysis) and digested with trypsin/Lys-C mix for 16 hr at 37°C. The digests were desalted using GL-Tip SDB (GL Sciences), and the eluates were evaporated in a SpeedVac concentrator and dissolved in 0.1% TFA.

LC-MS/MS analysis of the resultant peptides (400 ng each) was performed on an EASY-nLC 1200 UHPLC connected to a Q Exactive Plus mass spectrometer. The peptides were separated with a linear gradient of 4%–28% ACN for 0–150 min followed by an increase to 80% ACN during 150–170 min. The mass spectrometer was operated in the data-dependent acquisition mode with the top 10 MS/MS method. MS1 spectra were measured at a resolution of 70,000, an AGC target of  $1 \times 10^6$  and a mass range of 350 to 1,500  $m/z$ . HCD MS/MS spectra were acquired at a resolution of 17,500, an AGC target of  $5 \times 10^4$ , an isolation window of 2.0  $m/z$ , a maximum injection time of 60 msec and a normalized collision energy of 27. Dynamic exclusion was set to 10 s. Raw data were directly analyzed against Swiss-Prot database restricted to *Mus musculus* using Proteome Discoverer version 2.2 with Mascot search engine version 2.5 for identification and label-free precursor ion quantification.

The search parameters were (a) trypsin as an enzyme with up to two missed cleavages, (b) precursor mass tolerance of 10 ppm, (c) fragment mass tolerance of 0.02 Da, (d) carbamidomethylation of cysteine as a fixed modification, and (e) acetylation of protein N terminus and oxidation of methionine as variable modifications. Peptides and proteins were filtered at the FDR of 1% using the percolator node and the protein FDR validator node, respectively. Normalization was performed such that the sum total of abundance values for each sample over all peptides was the same.

### Quantitative RT-PCR analysis

Total cellular RNA was reverse-transcribed (RT) with PrimeScript Reverse Transcriptase (TaKaRa). Quantitative real-time polymerase chain reaction (PCR) was performed using SYBR Premix Ex Taq (TaKaRa) and a StepOnePlus Real-Time PCR System or a QuantStudio 6 Flex Real-Time PCR System (Applied Biosystems). The amplified products were confirmed to be single bands by gel electrophoresis.

### Purification of His-tag proteins

Full-length cDNAs encoding  $\beta 5$ ,  $\beta 5i$ , and  $\beta 5t$  were amplified from the tissues obtained from C57BL/6 mice and cloned into pET28a vector (Novagen). All constructs were verified by sequencing. BL21 (DL3) competent *E. coli* were transformed with the plasmids that encoded the polyhistidine-tagged (His-Tag)  $\beta 5$ ,  $\beta 5i$ , or  $\beta 5t$  proteins were induced by 1 mM isopropyl  $\beta$ -d-1-thiogalactopyranoside (IPTG) at 25°C for overnight, and purified by His Bind Kit according to the manufacturer's protocol (Novagen).

### Immunoblotting

Total cell lysates (2.5, 5, or 10  $\mu\text{g}$ ) were separated by electrophoresis on a 12% polyacrylamide gel and transferred onto a PVDF membrane (Millipore). After blocking with Blocking One solution (Nacalai Tesque), the membrane was incubated with primary antibodies

overnight at room temperature, followed by incubation with HRP-conjugated secondary antibodies. Protein bands on the membrane were detected with a ChemiDoc Touch Imaging System (Bio-Rad) or a Light Capture II (Atto) after incubation of the membrane with Clarity Western ECL Substrate (Bio-Rad).

### Gene ontology term analysis

Gene ontology for transcriptomic and proteomic data was analyzed by using DAVID Bioinformatics Resources 6.8 (<https://david.ncifcrf.gov>).

### QUANTIFICATION AND STATISTICAL ANALYSIS

Statistical analysis was carried out using GraphPad Prism 7 software, unless otherwise noted. Statistical significance was assessed using the two-tailed unpaired Student's *t* test with Welch's correction for unequal variances. *Q* value was calculated using the multiple unpaired *t* test with the false discovery rate approach (Benjamini and Hochberg, 1995). Quantification of proteins detected by immunoblot analyses was performed by using ImageJ v1.49 software. All values are expressed as means and SEMs, unless otherwise specified. The *n* numbers are indicated in figure legends.

### DATA AND CODE AVAILABILITY

RNA sequencing data have been deposited in The DNA Data Bank of Japan (DDBJ, <https://www.ddbj.nig.ac.jp>) with the accession number DRA008167 and DRA008878. MS proteomics data have been deposited to ProteomeXchange Consortium via jPOST partner repository (<https://repository.jpostdb.org>) with the dataset identifiers PXD013132 and PXD013133.

## Supplemental Information

### Trans-omics Impact of Thymoproteasome in Cortical Thymic Epithelial Cells

Izumi Ohigashi, Yu Tanaka, Kenta Kondo, Sayumi Fujimori, Hiroyuki Kondo, Amy C. Palin, Victoria Hoffmann, Mina Kozai, Yosuke Matsushita, Shinsuke Uda, Ryo Motosugi, Jun Hamazaki, Hiroyuki Kubota, Shigeo Murata, Keiji Tanaka, Toyomasa Katagiri, Hidetaka Kosako, and Yousuke Takahama



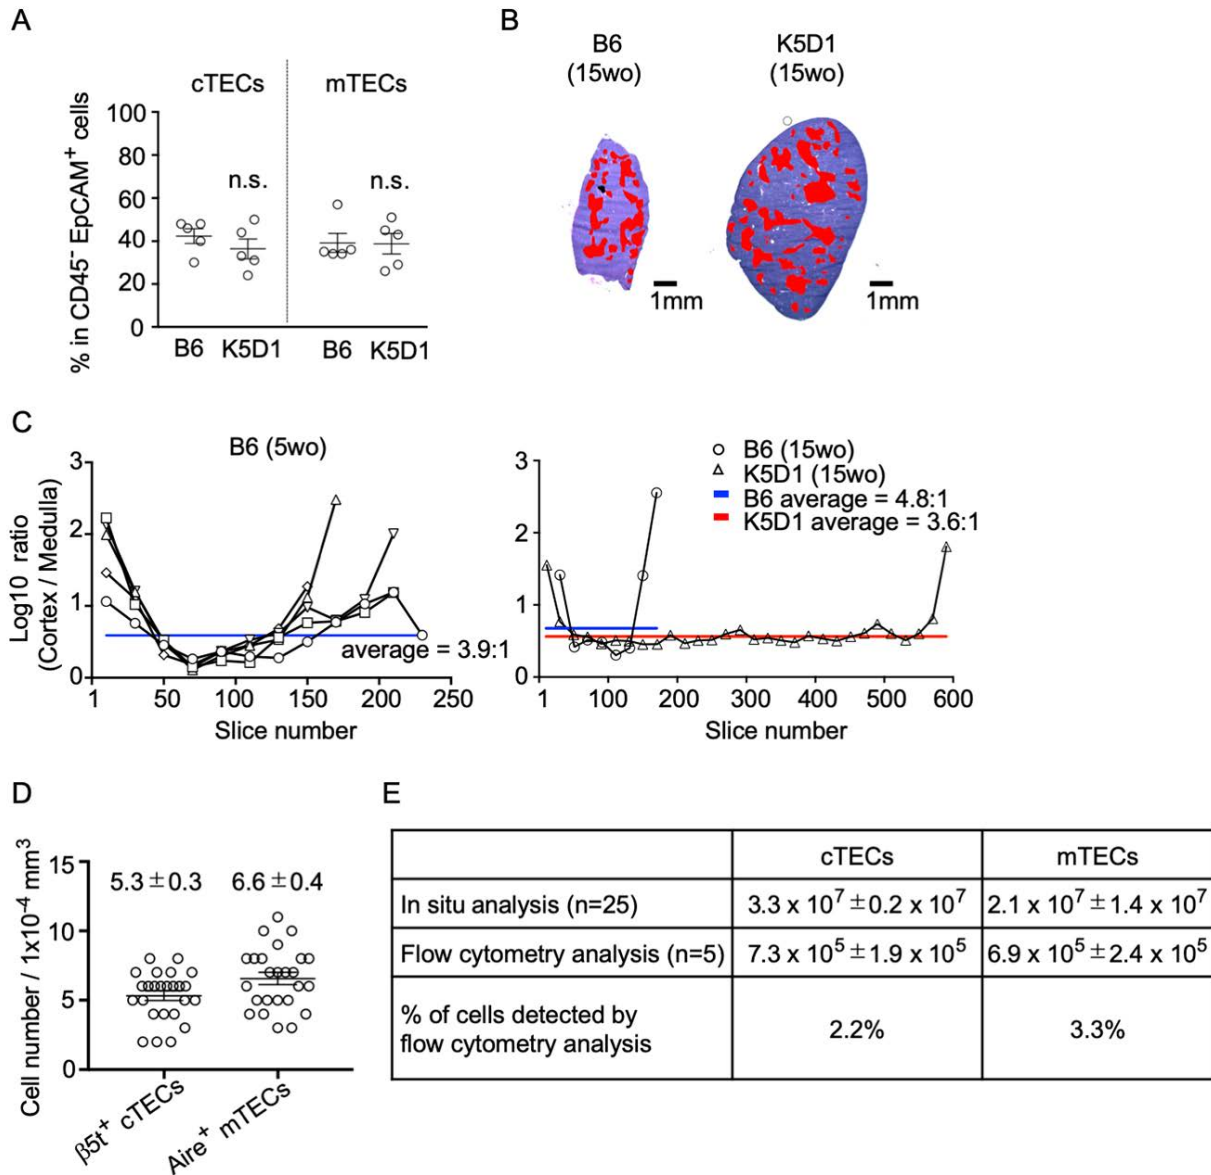

**Figure S1. Distribution and recovery of TECs from K5D1 mice** (Related to Figure 1)

(A) Flow cytometric analysis of TECs from B6 and K5D1 mice. Shown are plots of the frequency (means and SEMs,  $n = 5$ ) of  $Ly51^+ UEA1^-$  cTECs and  $Ly51^- UEA1^+$  mTECs within  $CD45^+ EpCAM^+$  cells in B6 and K5D1 mice.

(B) Representative images of thymic sections stained with hematoxylin and eosin. Indicated mice were analyzed at 15 weeks old. Bar, 1 mm. The medullary regions were highlighted in red.

(C) Ratios (in logarithmic scale) of the cortex and the medulla in serial coronal sections of snap-frozen right-side thymic lobes obtained from 5-week-old B6 mice (left; Sakata, et al. 2018) and from 15-week-old B6 and K5D1 mice (right), according to the methods described previously (Sakata, et al. 2018). Blue and red lines represent the average ratios in B6 thymus (blue) and K5D1 mice (red).

(D) Numbers of  $\beta 5t^+$  cTECs and  $Aire^+$  mTECs within a unit volume in the thymus of 15-week-old K5D1 mice were calculated as previously described (Sakata, et al. 2018). Means and SEMs of the numbers from 25 images are shown.

(E) Numbers of cTECs and mTECs in 15-week-old K5D1 mice were deduced from *in situ* thymic section analysis and flow cytometric analysis. The frequency of cells detected by flow cytometric analysis (i.e., numbers isolated from flow cytometric analysis / numbers deduced from *in situ* thymic section analysis) demonstrates equivalent efficiency of TEC isolation between 15-week-old K5D1 mice and 5-week-old B6 mice (Sakata, et al. 2018).

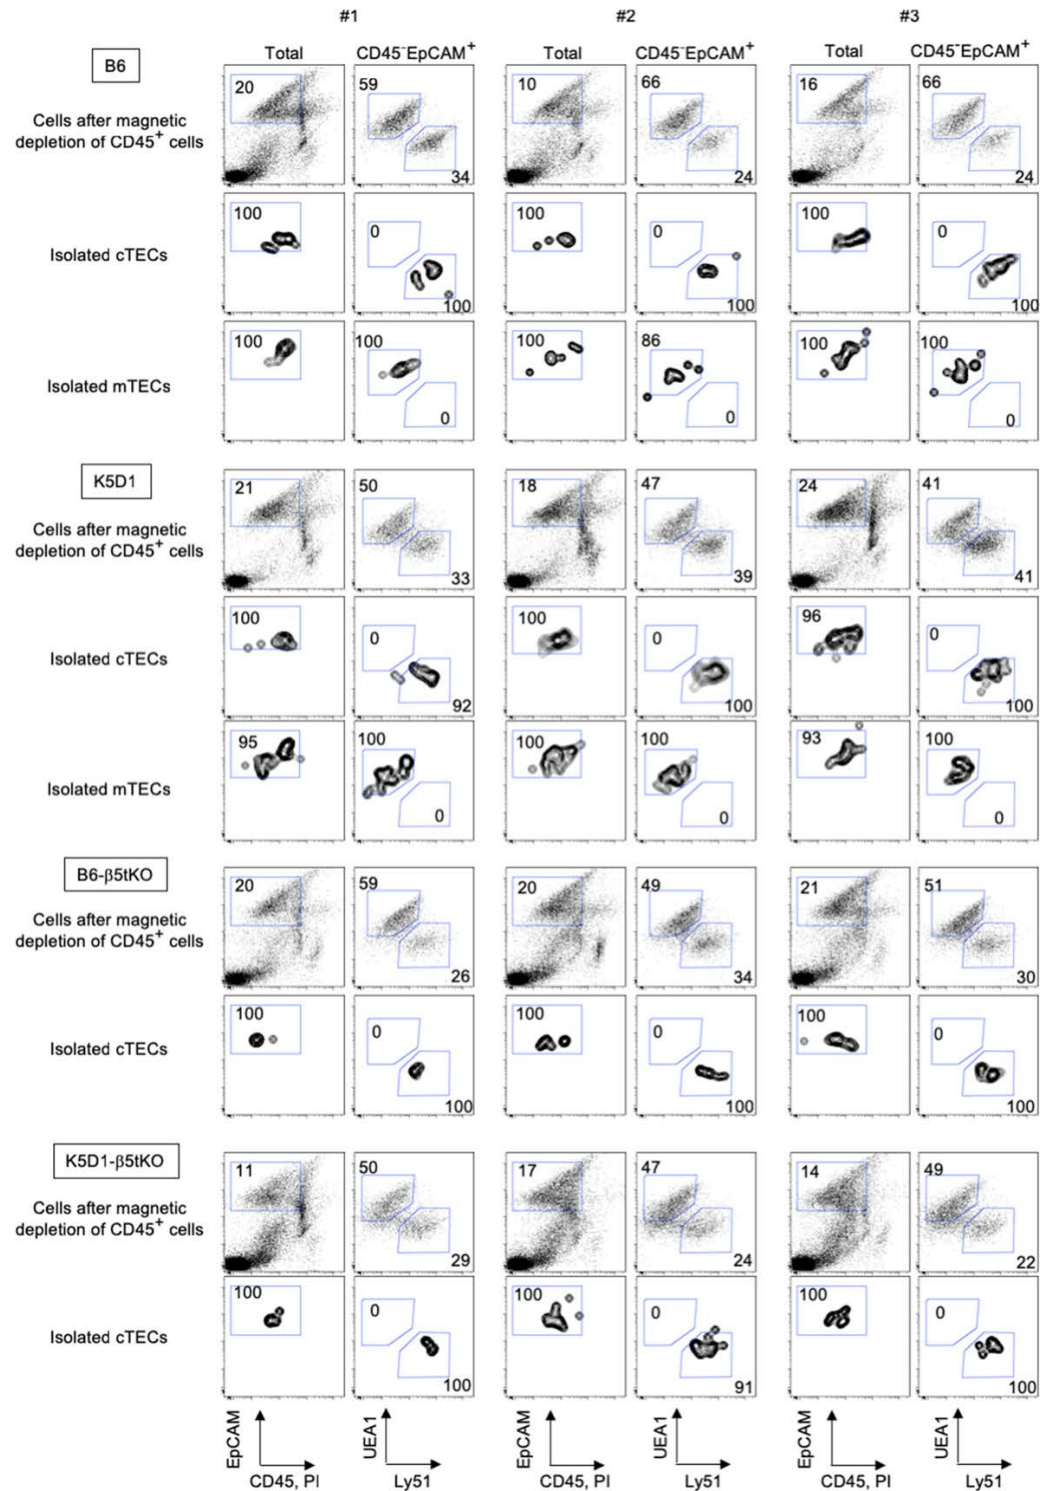

**Figure S2. Purity of isolated cTECs and mTECs for transcriptomic and proteomic analyses**  
(Related to Figure 2)

Flow cytometric analysis of indicated cells (n = 3) from indicated mice. Numbers indicate frequency of cells within indicated areas.

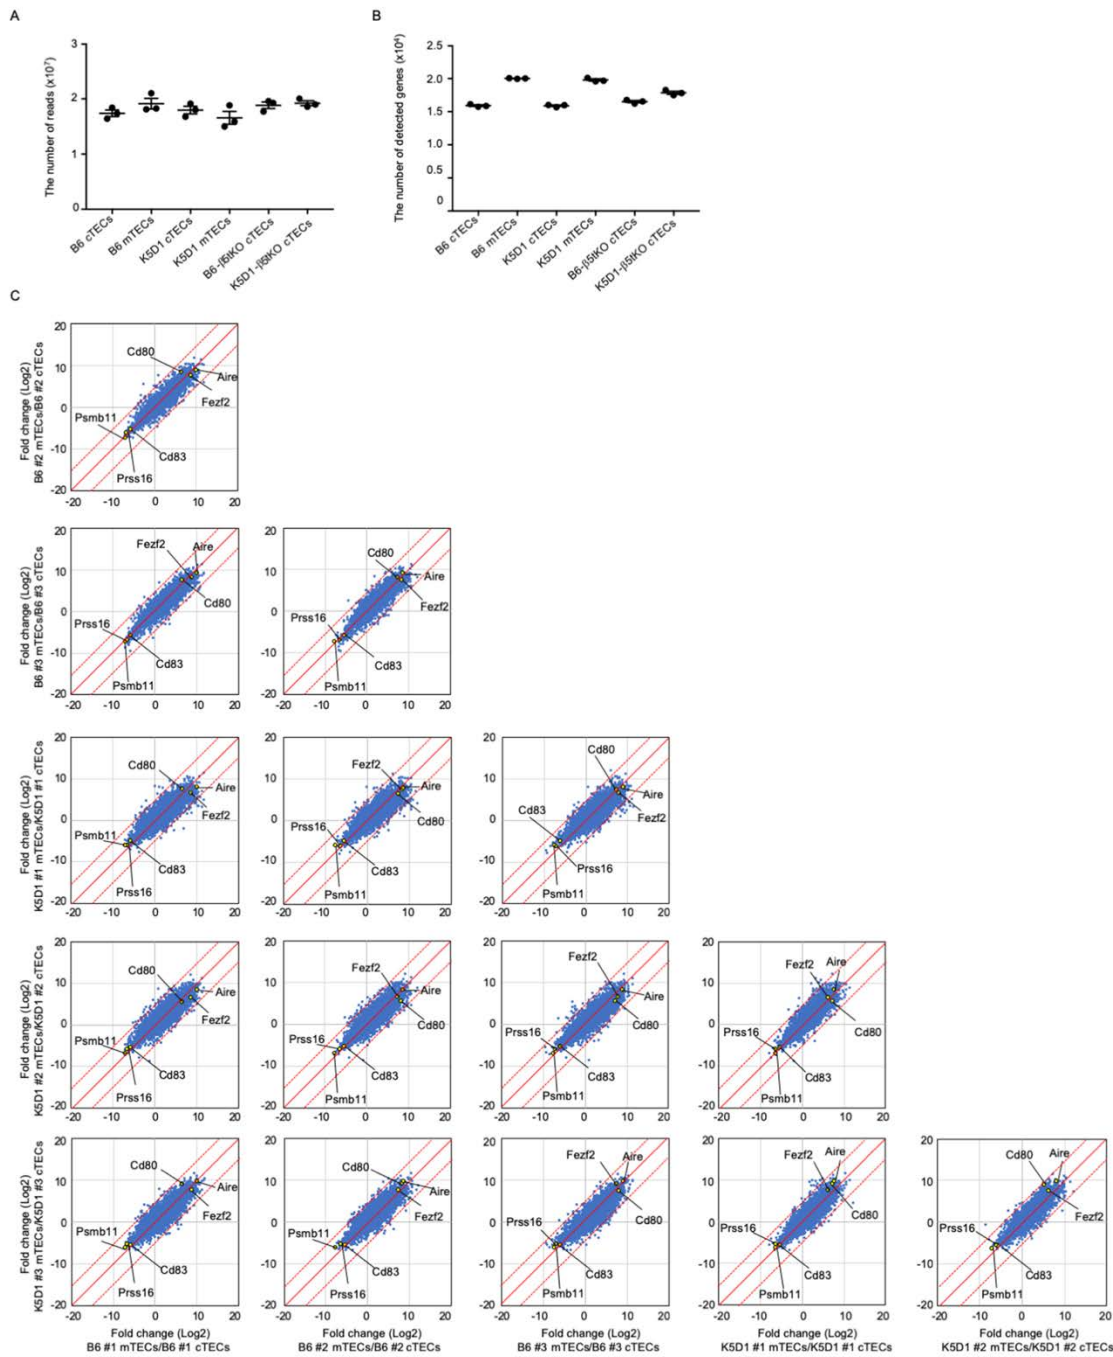

**Figure S3. Numerical depths and unbiased comparisons of gene expression profiles for RNA sequencing analysis of K5D1 TECs and B6 TECs (Related to Figure 3)**  
**(A)** Number of reads (means and SEM,  $n = 3$ ) and **(B)** number of detected genes in indicated cell populations.  
**(C)** Correlation plot analysis of the transcriptome according to  $\log_2$  fold change (mTECs / cTECs) among individual preparations.

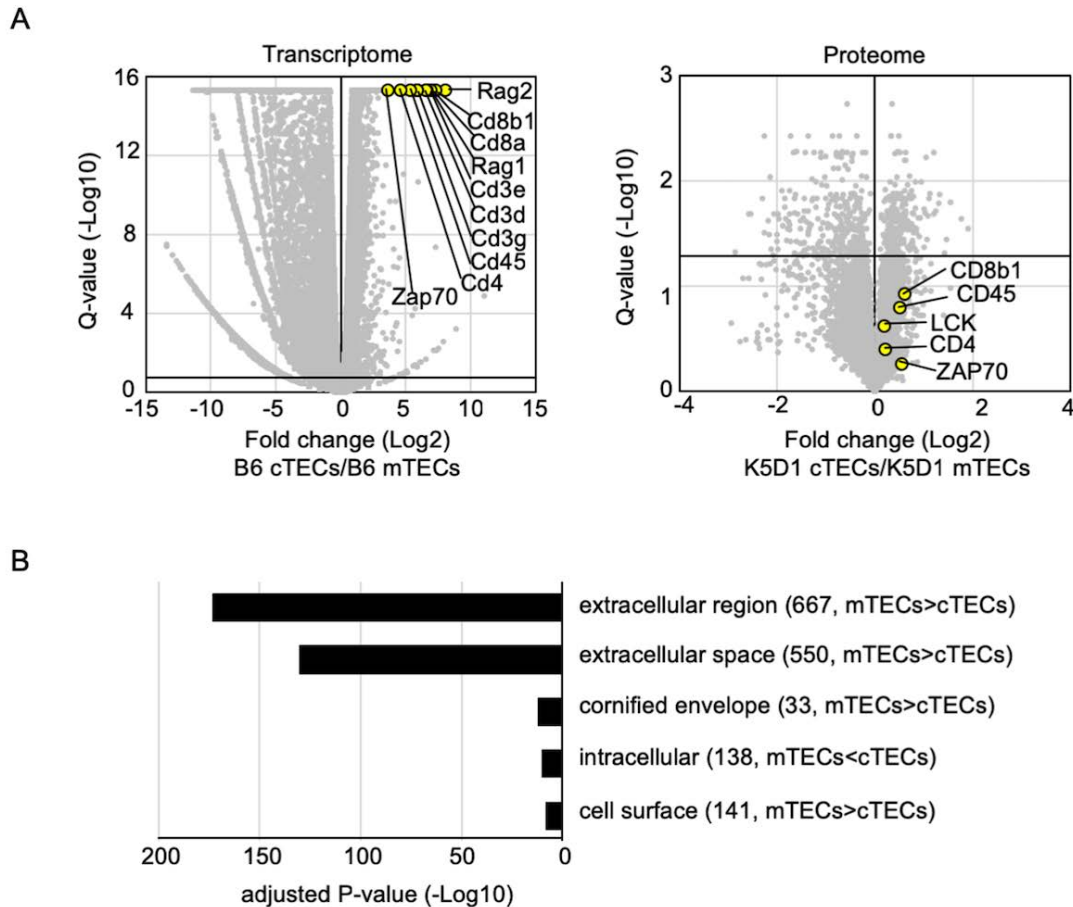

**Figure S4. Trans-omics analysis of cTECs and mTECs** (Related to Figure 4)

(A) Distinct contributions of TNC-enclosed CD4<sup>+</sup>CD8<sup>+</sup> thymocytes in transcriptomic and proteomic analyses. Volcano plots of CD4<sup>+</sup>CD8<sup>+</sup> thymocyte-derived molecules (yellow symbols) in RNA sequencing transcriptomic analysis (left) and TMT-based proteomic analysis (right). Detected molecules are plotted as log<sub>2</sub> fold changes (K5D1 cTECs / K5D1 mTECs) versus -log<sub>10</sub> Q-values. Black horizontal line in the plot shows the Q-value of 0.05.

(B) Enrichment analysis of the ontology for molecules differently expressed between mTECs and cTECs in transcriptomic analysis but not proteomic analysis. Molecules that were significantly different (RPKM > 1, log<sub>2</sub> fold change > 1 or < -1, Q < 0.05) between K5D1 mTECs and K5D1 cTECs in the transcriptomic analysis, annotated with the gene ontology, and not detected in the proteomic analysis (2,989 molecules for mTECs and 1,070 molecules for cTECs) were analyzed for the enrichment in the ontology. Bars show the adjusted P-value of top 5 categories enriched in either mTECs or cTECs. Numbers in parentheses indicate the number of categorized genes.



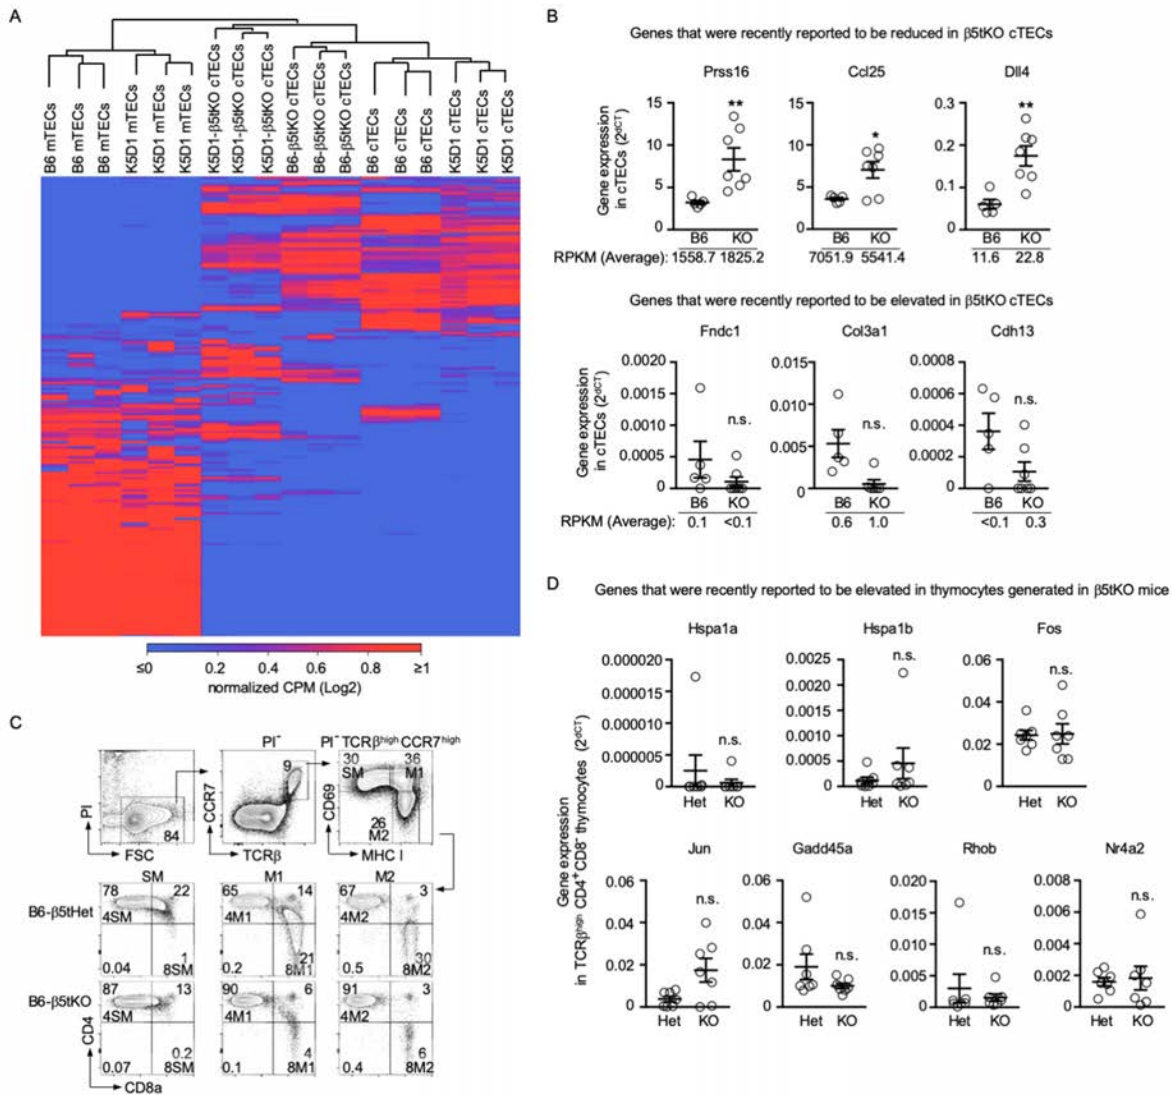

**Figure S5. Transcriptomic analysis of cTECs and thymocytes in  $\beta 5t$ -KO mice** (Related to Figure 5)

(A) Unsupervised hierarchical cluster analysis and heatmap of detected genes in indicated cTECs and mTECs ( $n = 3$ ) isolated from B6 mice, K5D1 mice, B6- $\beta 5t$ KO mice, and K5D1- $\beta 5t$ KO mice.

(B) Quantitative RT-PCR analysis of the gene expression that was recently reported (Apavaloaei, et al., 2019) to be either reduced (top) or elevated (bottom) in  $\beta 5t$ KO cTECs in comparison with control cTECs. Plotted are the mRNA expression levels (means and SEMs,  $n = 5-7$ ) of indicated genes relative to *Gapdh* in B6 cTECs and B6- $\beta 5t$ KO cTECs. Numbers at the bottom of the plots show average RPKM values in RNA sequencing data.

(C) Shown are representative plots of propidium iodide (PI) fluorescence and forward scatter (FSC) intensity in total thymocytes (top left), CCR7 and TCR $\beta$  expression in PI<sup>-</sup> viable thymocytes (top middle), and CD69 and MHC class I expression in PI<sup>-</sup> TCR $\beta$ <sup>high</sup> CCR7<sup>high</sup> viable thymocytes (top right). Plots in the middle and bottom panels show CD4 and CD8 $\alpha$  expression profiles in MHC class I<sup>low</sup> CD69<sup>high</sup> TCR $\beta$ <sup>high</sup> CCR7<sup>high</sup> semi-mature stage (SM) thymocytes (left), MHC class I<sup>high</sup> CD69<sup>high</sup> TCR $\beta$ <sup>high</sup> CCR7<sup>high</sup> mature 1 stage (M1) thymocytes (center), and MHC class I<sup>high</sup> CD69<sup>low</sup> TCR $\beta$ <sup>high</sup> CCR7<sup>high</sup> mature 2 stage (M2) thymocytes (right) in B6- $\beta 5t$ Het mice (middle panels) and B6- $\beta 5t$ KO mice (bottom panels). Numbers indicate frequency of cells within indicated areas.

(D) Quantitative RT-PCR analysis of gene expression that was recently reported (Apavaloaei, et al., 2019) to be elevated in TCR $\beta$ <sup>high</sup> CD4<sup>+</sup> CD8<sup>-</sup> thymocytes in  $\beta 5t$ KO mice. Plotted are the mRNA expression levels (means and SEMs,  $n = 7$ ) of indicated genes relative to *Gapdh* in TCR $\beta$ <sup>high</sup> CD4<sup>+</sup> CD8<sup>-</sup> thymocytes isolated from B6- $\beta 5t$ Het and B6- $\beta 5t$ KO mice. \* $P < 0.05$ ; \*\* $P < 0.01$ ; n.s., not significant.

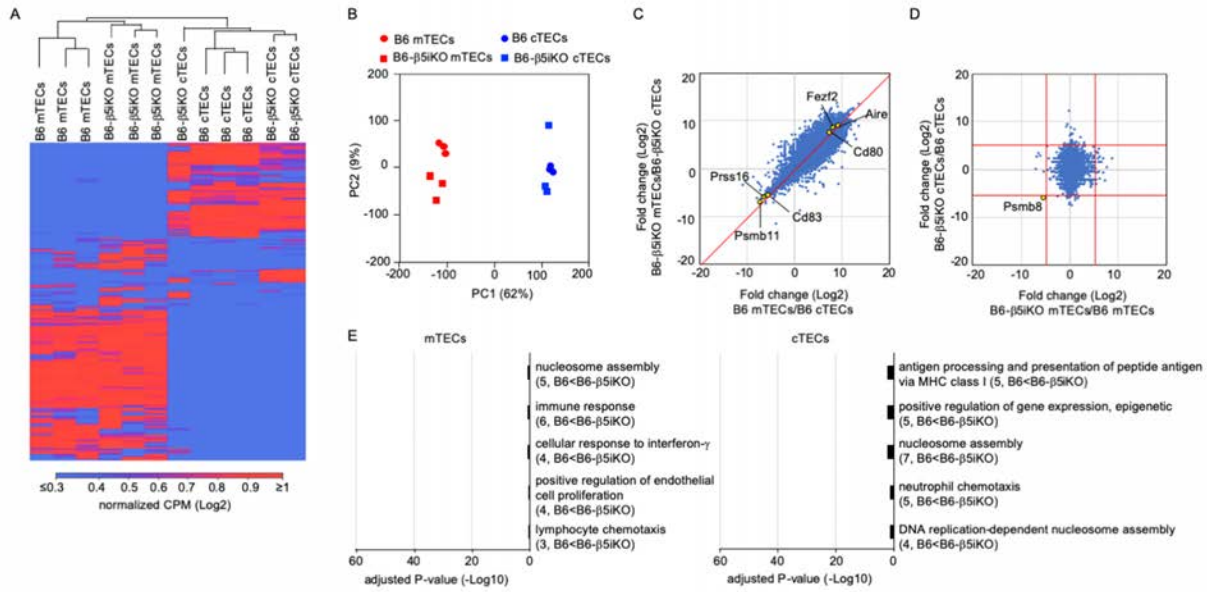

**Figure S6. RNA sequencing analysis of cTECs and mTECs isolated from  $\beta 5i$ -deficient mice**

(Related to Figure 5)

(A) Unsupervised hierarchical cluster analysis and heatmap of genes detected in individual TEC samples ( $n = 3$ ) isolated from B6 mice and B6- $\beta 5i$ KO mice.

(B) Principal component (PC) analysis of RNA sequencing data of indicated cell populations.

(C) Correlation plot analysis of the transcriptome according to  $\log_2$  fold change (mTECs/cTECs) between B6 and B6- $\beta 5i$ KO TECs.

(D) Correlation plot analysis of the transcriptome according to  $\log_2$  fold change (B6- $\beta 5i$ KO/B6) between mTECs and cTECs.

(E) Ontology enrichment analysis of genes that are differentially expressed ( $RPKM > 1$ ,  $\log_2$  fold change  $> 1$  or  $< -1$ ,  $Q < 0.05$ ) between B6 and B6- $\beta 5i$ KO TECs. Bars show the adjusted P-values of top five categories enriched in mTECs (left) and cTECs (right). Numbers in parentheses indicate the number of categorized genes.

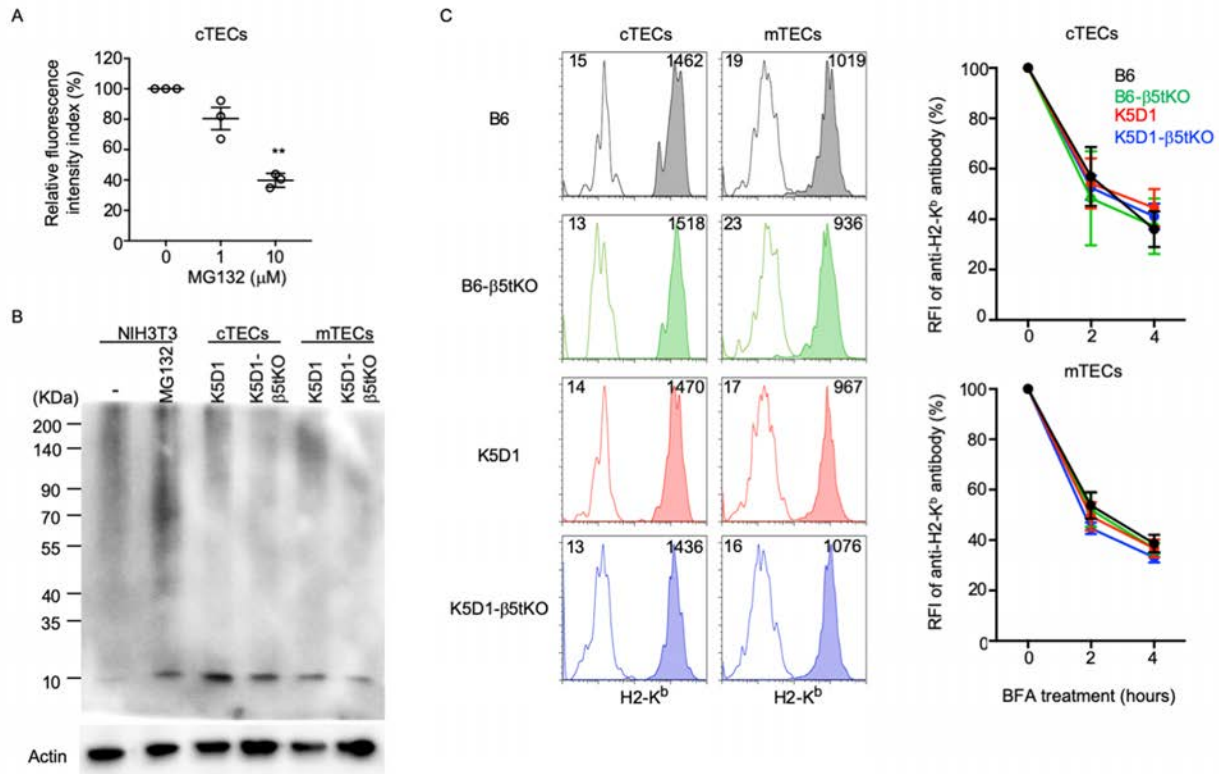

**Figure S7. Characterization of cTECs and mTECs in  $\beta\text{5t}$ -deficient mice**  
(Related to Figure 7)

(A) Fluorescence-based proteasome activity in B6 cTECs in the presence of MG132 proteasome inhibitor. Shown are plots of relative fluorescence intensity index (means and SEMs,  $n = 3$ ).  $**P < 0.01$ .

(B) Immunoblot analysis of ubiquitin in cTECs and mTECs isolated from K5D1 and K5D1- $\beta\text{5tKO}$  mice. NIH3T3 cells with or without proteasome inhibitor MG132 treatment were also examined. Immunoblot for  $\beta$ -actin was examined as loading control.

(C) Cell surface expression and decay of MHC class I molecule H-2K<sup>b</sup> expressed by cTECs and mTECs. Shaded histograms show H-2K<sup>b</sup> expression on cTECs and mTECs in indicated mice, without brefeldin A treatment. Open histograms represent control fluorescence in the absence of anti-H-2K<sup>b</sup> antibody. Numbers in histograms show the mean fluorescence intensities (MFIs) of isotype control antibody (left) and anti-H-2K<sup>b</sup> antibody (right). Plots on the right show relative fluorescence intensity index (RFI, means and SEMs,  $n = 4-7$ ) of H-2K<sup>b</sup> expression at 2 and 4 hours after brefeldin A treatment in comparison with the intensity before the treatment.
